# Supplementary material for: Measuring and modeling investigation of the net photochemical ozone production rate via an improved dual-channel reaction chamber technique
Source: Copernicus journal article supplement (doi:10.5194/acp-23-9891-2023), 2023-09-06
Supplement: Supplementary file 1 [file acp-23-9891-2023-supplement.pdf]

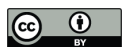

*Supplement of*

## **Measuring and modeling investigation of the net photochemical ozone production rate via an improved dual-channel reaction chamber technique**

**Yixin Hao et al.**

*Correspondence to:* Jun Zhou (junzhou@jnu.edu.cn) and Bin Yuan (byuan@jnu.edu.cn)

The copyright of individual parts of the supplement might differ from the article licence.

1 **S1: The reaction and reference chambers.**

2 **1.1 Schematic diagram**

3 The specifications of the reaction and reference chambers are basically the same, which are composed of  
4 a quartz glass cylinder, two O rings, two PTFE plates, and PTFE joint connections. Both inlet and outlet  
5 of the quartz cylinder are connected to the PTFE plates and sealed by the O rings, the PTFE plates were  
6 then fixed by the stainless-steel plates on a stainless-steel shelf. The length and inner diameter of the  
7 quartz glass cylinder are 700 mm and 190.5 mm, respectively. The PTFE plate has a PTFE tube (outer  
8 diameter of 12.7 mm) for air intake and outflow. For air inject, an PTFE tube passes through one PTFE  
9 plate and is bent as “L-shape” at the inner surface side of the PTFE plate. The other PTFE plate on the  
10 other side is equipped with a straight PTFE tube for air outflow (see Fig. S1).

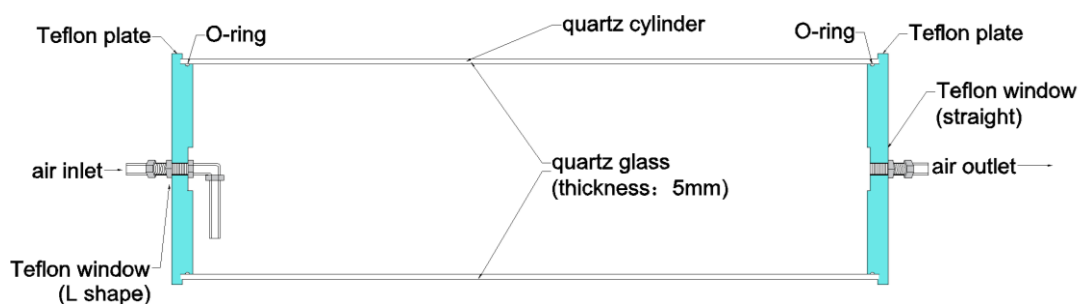

11  
12 **Figure S1: Schematic diagram of the reaction and reference chambers.**

13 **1.2 Residence time of air in the reaction and reference chambers**

14 The residence time of air in the two chambers ( $\langle\tau\rangle$ ) are critical for calculating  $P(O_3)_{\text{net}}$ . The air flow rate  
15 through the reaction and reference chambers can be set at 1.3, 2, 3, 4, and 5 L min<sup>-1</sup>, respectively,  
16 depending on the measurement environment, therefore the residence time of air in these two chambers  
17 under different air flow rates were also varied. The experimental schematic diagram and results of other  
18 air flow rates are shown in the Supplement (Figs. S2 and S3).

19 We first measured  $\langle\tau\rangle$  by introducing a short pulse of NO<sub>2</sub> gas at 5 L min<sup>-1</sup> (obtained by mixing 0.2  
20 L min<sup>-1</sup> of 2.08 ppmv NO<sub>2</sub> standard gas with 5.2 L min<sup>-1</sup> ultrapure) into the reaction and reference  
21 chambers at  $\tau = 0$ , the airflow rates in the reaction and reference chambers were controlled by the flow  
22 rate of the CAPS-NO<sub>2</sub> monitor (1.11 L min<sup>-1</sup>) and pump (3.89 L min<sup>-1</sup>), the time profile of NO<sub>2</sub> mixing  
23 ratios ( $C(\tau)$ ) at the exit of the chamber was measured using the CAPS-NO<sub>2</sub> monitor. The pulse width of

24 the introduced NO<sub>2</sub> gas was approximately 20 s and sufficiently shorter than  $\langle\tau\rangle$ .  $C(\tau)$  is normalized by  
25 Eq. (S1), which converts  $C(\tau)$  to a probability density function ( $E(\tau)$ ) (Sadanaga et al., 2017).

26 
$$E(\tau) = \frac{C(\tau)}{\int_0^{\infty} C(\tau) d\tau} \quad (\text{S1})$$

27  $\langle\tau\rangle$  is an expectation value and was calculated using Eq. (S2).

28 
$$\langle\tau\rangle = \int_0^{\infty} \tau E(\tau) d\tau = \int_0^{\infty} \frac{\tau C(\tau)}{\int_0^{\infty} C(\tau) d\tau} d\tau \quad (\text{S2})$$

29 Three sets of experiments of  $\langle\tau\rangle$  of NO<sub>2</sub> in the reaction and reference chambers were carried out,  
30 and the average  $\langle\tau\rangle$  of NO<sub>2</sub> in the reaction and reference chambers were both 0.063 h, indicating that  
31 there was no difference in the average  $\langle\tau\rangle$  of the sampled air in these two chambers. We also investigated  
32  $\langle\tau\rangle$  of NO<sub>2</sub> at the flow rate of 1.3, 2, 3, and 4 L min<sup>-1</sup>, the measured average  $\langle\tau\rangle$  were all closed to the  
33 theoretical values. Figure S2 shows the schematic diagram of the experiments. We described the results  
34 at the flow rates of 1.3, 2, 3, 4, and 5 L min<sup>-1</sup> in Fig. S3 and Table S1.

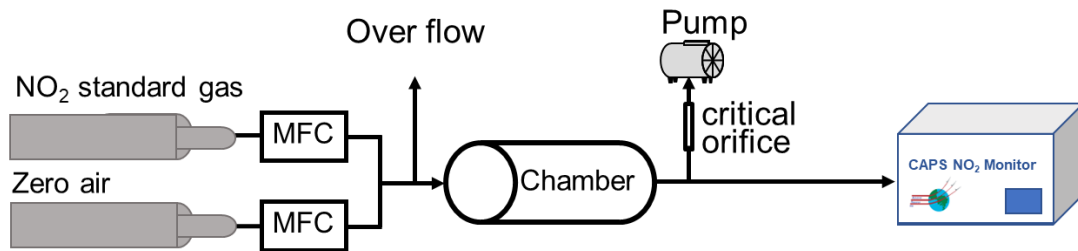

35  
36 **Figure S2: Schematic diagram for measuring average residence time (MFC: Mass Flow Controller).**

37  
38  
39

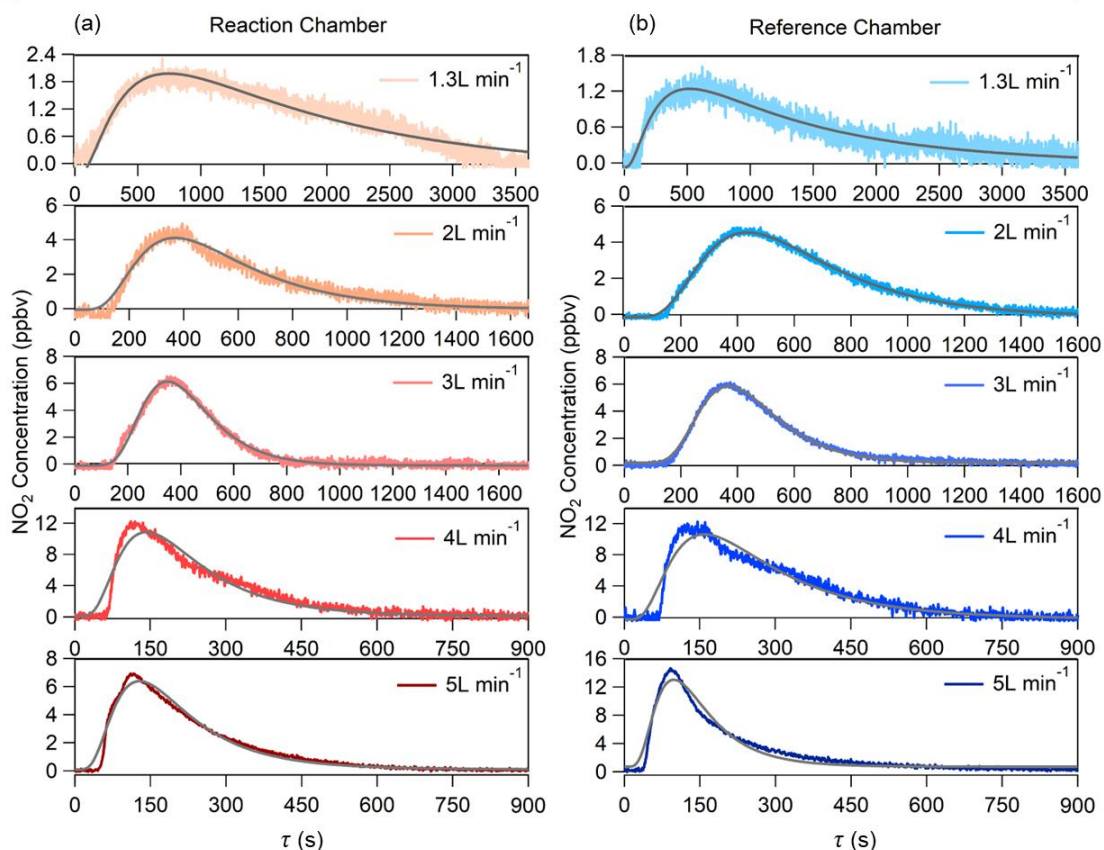

40

41 **Figure S3: Average  $E(\tau)$  time profiles in (a) the reaction and (b) the reference chambers at the sampling flow**  
 42 **rates of 1.3, 2, 3, 4, and 5 L min<sup>-1</sup>, respectively. The related residence time of NO<sub>2</sub> in the reaction and reference**  
 43 **chambers of each air flow rate is shown in Table S1.**

44

45 **Table S1. Average residence time of air in the reaction and reference chambers.**

| Flow rate of air (L min <sup>-1</sup> ) | Average residence time (h) |                   |
|-----------------------------------------|----------------------------|-------------------|
|                                         | Reaction chamber           | Reference chamber |
| 1.3                                     | 0.350±0.0020               | 0.321±0.0026      |
| 2                                       | 0.160±0.0015               | 0.164±0.0022      |
| 3                                       | 0.111±0.0004               | 0.142±0.0002      |
| 4                                       | 0.067±0.0003               | 0.074±0.0003      |
| 5                                       | 0.063±0.0007               | 0.063±0.0005      |

46

### 1.3 Wall losses of NO<sub>2</sub> and O<sub>3</sub> in the reaction and reference chambers

47

In order to investigate the wall loss of O<sub>3</sub> or NO<sub>2</sub>, we injected several steams of O<sub>3</sub> or NO<sub>2</sub> with different

48

mixing ratios into the reaction and reference chambers, and measured the O<sub>3</sub> or NO<sub>2</sub> mixing ratios at the

49 inlet and outlet of the chambers. The O<sub>3</sub> used here were generated by injecting the ultrapure air into an  
50 O<sub>3</sub> generator (P/N 97-0067-02, Analytic Jena, USA), O<sub>3</sub> mixing ratios were measured by a 2B O<sub>3</sub> monitor  
51 based on a dual-channel UV-absorption technique (Model 205, 2B Technology, USA), and NO<sub>2</sub> mixing  
52 ratios was monitored by the CAPS-NO<sub>2</sub> monitor. The wall losses of O<sub>3</sub> and NO<sub>2</sub> can be calculated as:

$$53 \quad O_3 \text{ loss} = \left(1 - \frac{[O_3]_{\text{out}}}{[O_3]_{\text{in}}}\right) \times 100 \% \quad (\text{S3})$$

$$54 \quad \text{NO}_2 \text{ loss} = \left(1 - \frac{[\text{NO}_2]_{\text{out}}}{[\text{NO}_2]_{\text{in}}}\right) \times 100 \% \quad (\text{S4})$$

55 where [O<sub>3</sub>]<sub>out</sub> and [NO<sub>2</sub>]<sub>out</sub> represent the mixing ratio of gas passing through the reaction and reference  
56 chambers, [O<sub>3</sub>]<sub>in</sub> and [NO<sub>2</sub>]<sub>in</sub> represent the mixing ratio of gas passing through then bypass.

57 The experiments were conducted under dark conditions, the experimental schematic diagram is  
58 shown in Fig. S4, and the results at the air flow rate of 1.3, 2, 3, 4, and 5 L min<sup>-1</sup> are shown in Figs. S5-  
59 S6 and Tables S2-S5. From Figs. S5-S6, at the air flow rate of 5 L min<sup>-1</sup>, wall losses of O<sub>3</sub> in the reaction  
60 and reference chambers were found to be approximately 0 % and 0.7 %, respectively, wall losses of NO<sub>2</sub>  
61 were found to be approximately less than 1.0 % for both chambers, which were smaller than the wall loss  
62 of Ox in previous studies (as shown in Table S6), this indicates the small effects of Ox loss to  $P(\text{O}_3)_{\text{net}}$   
63 measurements in our NPOPR detection system. To investigate the influence of different flow rates to the  
64 Ox wall losses, we also tested the wall loss of O<sub>x</sub> at flow rates of 1.3, 2, 3, and 4 L min<sup>-1</sup>, respectively,  
65 we found that with the increase of the flow rate, the Ox wall losses decreased, but even with the flow rate  
66 of 1.3 L min<sup>-1</sup>, the wall losses were still smaller than 4 % and 2 % in the reaction chamber and the reference  
67 chambers, respectively, more details are shown in Table S2. At the air flow rates of 1.3, 2, 3, and 4 L min<sup>-1</sup>  
68 <sup>1</sup>, the wall losses of O<sub>3</sub> in the reaction chamber were found to be approximately 2 %, 0 %, 0 %, and 0 %,   
69 respectively, the wall losses of O<sub>3</sub> in the reference chamber was found to be approximately 2 %, 1 %,   
70 1 %, and 0 %, respectively. While the wall losses of NO<sub>2</sub> in the reaction chamber at the air flow rates of  
71 1.3, 2, 3, and 4 L min<sup>-1</sup> were found to be approximately 4 %, 4 %, 2 %, and 0 %, respectively, the wall  
72 losses of NO<sub>2</sub> in the reference chamber were found to be approximately 2 %, 1 %, 0 %, and 0 %,   
73 respectively. The regression lines have non-zero intercepts but not significant. We added the regression  
74 fittings without intercept, and compared the regression fitting results with and without intercept (as  
75 shown in Figs. S5 and S6). We found that the O<sub>3</sub> and NO<sub>2</sub> wall losses were not much different (as shown  
76 in Tables S2 and S3), and the wall loss affected by the fitting intercepts for NO<sub>2</sub> (at ambient mixing ratios  
77 of 0-100 ppbv) and O<sub>3</sub> (at ambient mixing ratios of 0-200 ppbv) at the air flow rate of 5 L min<sup>-1</sup> were all

78 below 4 % (as shown in Tables S4 and S5). We found that when the O<sub>3</sub> have negative intercepts, the O<sub>3</sub>  
79 wall losses are still below 4 %, which is not significant.

80 Sklaveniti et al. (2018) found that the wall loss of NO<sub>2</sub> is significantly less than that of O<sub>3</sub> at higher  
81 humidity levels. However, in our O<sub>3</sub> photo-enhanced uptake experiments, the wall loss of O<sub>3</sub> was almost  
82 unaffected by humidity at a flow rate of 5 L min<sup>-1</sup>. We also tested the wall losses of NO<sub>2</sub> and O<sub>3</sub> in the  
83 chamber at a 5 L min<sup>-1</sup> flow rate at different humidities of 35-75 %, the detailed results are shown in Fig.  
84 S7 and S8, which shows that the variation in humidity effected the wall loss of NO<sub>2</sub> and O<sub>3</sub> by 0.03-  
85 0.12 % and 1.06-1.19 %, respectively, which is much smaller than the instrument detection error (which  
86 is 2 % at ambient NO<sub>2</sub> mixing ratios of 0-100 ppb), thus we didn't count this interference during the data  
87 analysis.

88

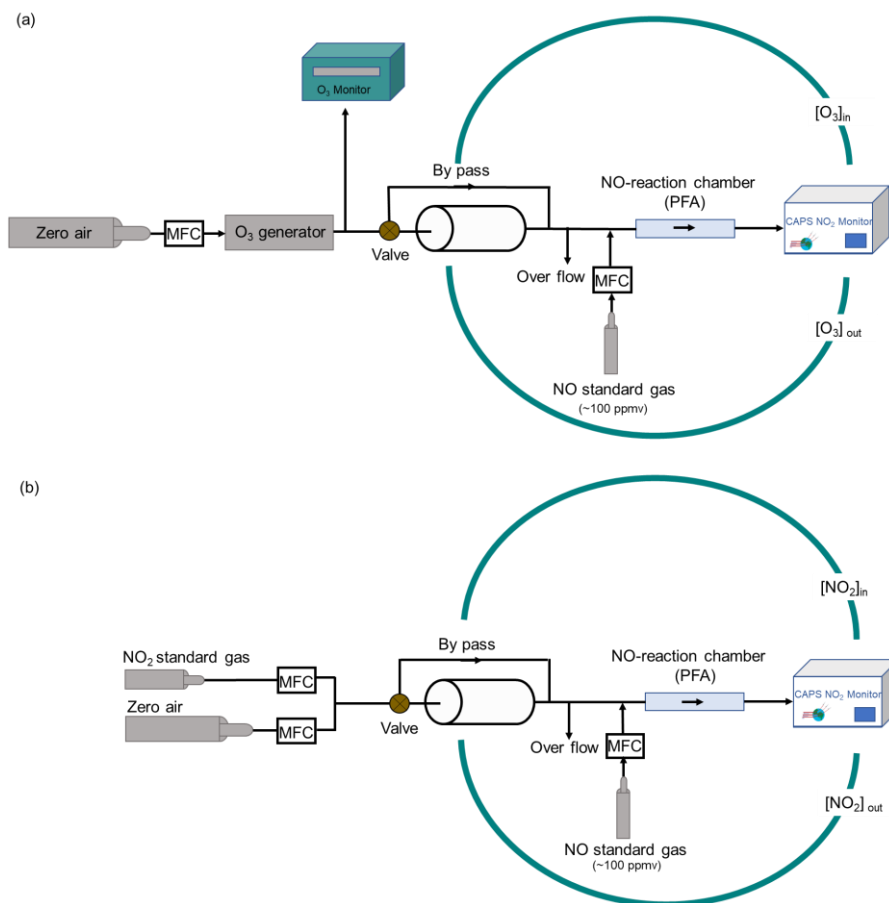

89  
90

91 **Figure S4: Schematic diagram for testing (a) O<sub>3</sub> and (b) NO<sub>2</sub> wall loss in the reaction and reference chambers**  
92 **(MFC: Mass Flow Controller).**

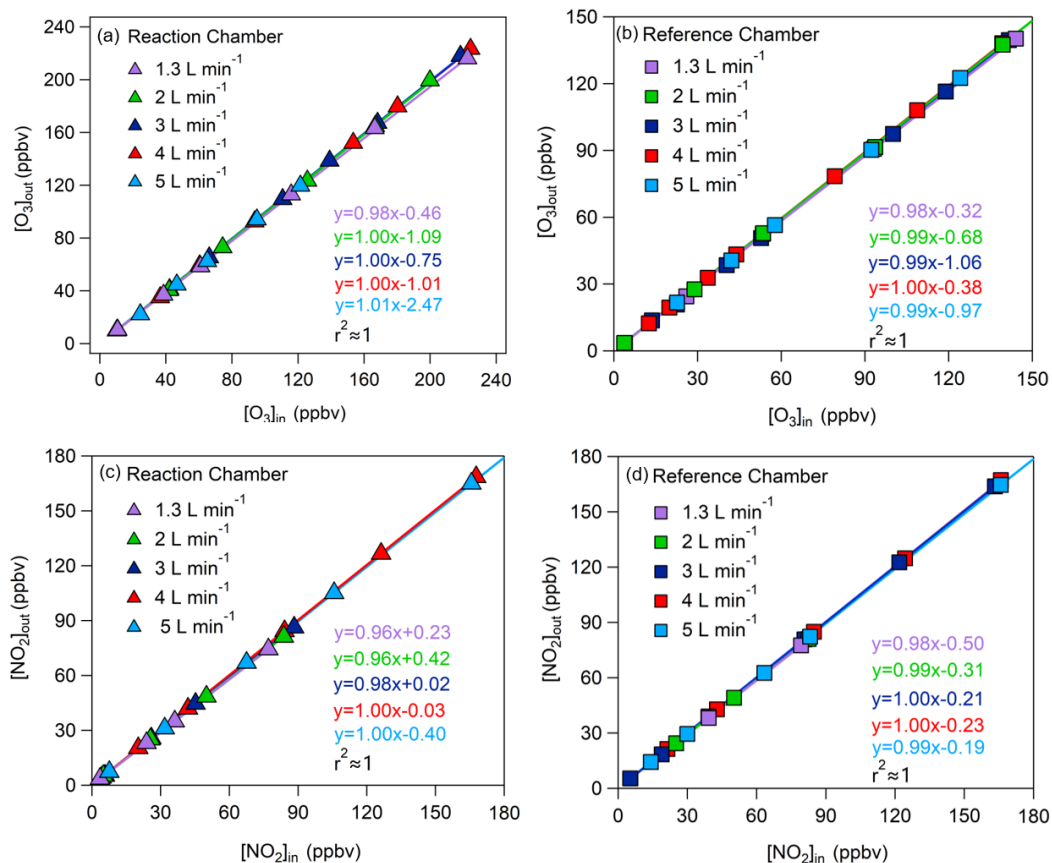

93

94 **Figure S5: Relationship between (a,b) [O<sub>3</sub>]<sub>in</sub> and [O<sub>3</sub>]<sub>out</sub> and (c,d) [NO<sub>2</sub>]<sub>in</sub> and [NO<sub>2</sub>]<sub>out</sub> in the reaction and**  
 95 **reference chambers with intercepts at the flow rates of 1.3, 2, 3, 4, and 5 L min<sup>-1</sup>, respectively, the solid lines**  
 96 **represent the linear fitting of the O<sub>3</sub> or NO<sub>2</sub> mixing ratios at the inlet and outlet of the chambers.**

97

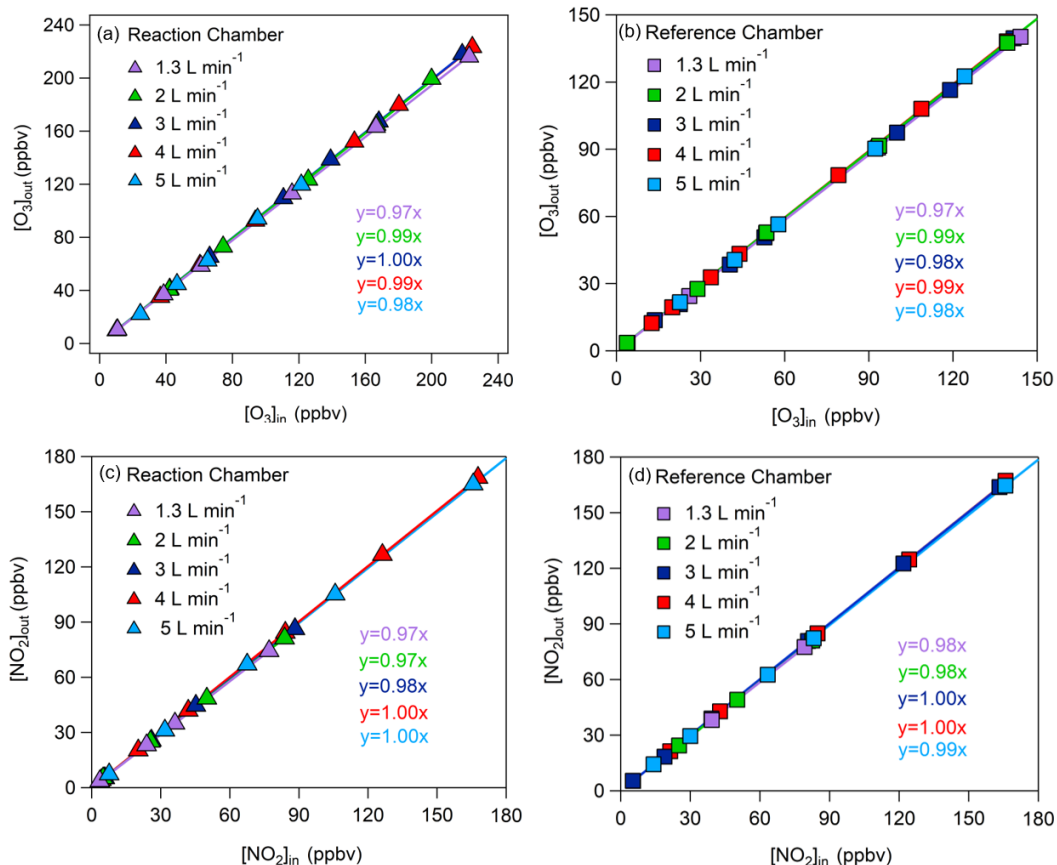

98

99 **Figure S6: Relationship between (a, b) [O<sub>3</sub>]<sub>in</sub> and [O<sub>3</sub>]<sub>out</sub> and (c,d) [NO<sub>2</sub>]<sub>in</sub> and [NO<sub>2</sub>]<sub>out</sub> in the reaction and**  
 100 **reference chambers without intercepts at the flow rates of 1.3, 2, 3, 4, and 5 L min<sup>-1</sup>, respectively, the solid**  
 101 **lines represent the linear fitting of the O<sub>3</sub> or NO<sub>2</sub> mixing ratios at the inlet and outlet of the chambers.**

102

103

**Table S2. Wall losses of O<sub>3</sub> and NO<sub>2</sub> of the reaction and reference chambers with intercepts.**

| Flow rate of air<br>(L min <sup>-1</sup> ) | Wall losses of O <sub>3</sub> (%) |                   | Wall losses of NO <sub>2</sub> (%) |                   |
|--------------------------------------------|-----------------------------------|-------------------|------------------------------------|-------------------|
|                                            | Reaction chamber                  | Reference chamber | Reaction chamber                   | Reference chamber |
| 1.3                                        | 2.0                               | 2.0               | 4.0                                | 2.0               |
| 2                                          | 0.0                               | 1.0               | 4.0                                | 1.0               |
| 3                                          | 0.0                               | 1.0               | 2.0                                | 0.0               |
| 4                                          | 0.0                               | 0.0               | 0.0                                | 0.0               |
| 5                                          | 0                                 | 0.7               | 0.3                                | 0.6               |

104

105

106

107



108 **Table S3. Wall losses of O<sub>3</sub> and NO<sub>2</sub> of the reaction and reference chambers without intercepts.**

| Flow rate of air<br>(L min <sup>-1</sup> ) | Wall losses of O <sub>3</sub> (%) |                   | Wall losses of NO <sub>2</sub> (%) |                   |
|--------------------------------------------|-----------------------------------|-------------------|------------------------------------|-------------------|
|                                            | Reaction chamber                  | Reference chamber | Reaction chamber                   | Reference chamber |
| 1.3                                        | 3.0                               | 3.0               | 3.0                                | 2.0               |
| 2                                          | 1.0                               | 1.0               | 3.0                                | 2.0               |
| 3                                          | 0.0                               | 2.0               | 2.0                                | 0.0               |
| 4                                          | 1.0                               | 1.0               | 0.0                                | 0.0               |
| 5                                          | 2.0                               | 2.0               | 0.0                                | 1.0               |

109

110 **Table S4. NO<sub>2</sub> wall loss affected by the intercept.**

| Ambient NO <sub>2</sub> mixing ratios<br>(ppbv) | Wall loss affected by the intercept (NO <sub>2</sub> , %) |                   |
|-------------------------------------------------|-----------------------------------------------------------|-------------------|
|                                                 | Reaction chamber                                          | Reference chamber |
| 20                                              | 2.0                                                       | 2.0               |
| 40                                              | 1.0                                                       | 1.5               |
| 60                                              | 0.7                                                       | 1.3               |
| 80                                              | 0.5                                                       | 1.2               |
| 100                                             | 0.4                                                       | 1.2               |

111

112 **Table S5. O<sub>3</sub> wall loss affected by the intercept.**

| Ambient O <sub>3</sub> mixing ratios<br>(ppbv) | Wall loss affected by the intercept (O <sub>3</sub> , %) |                   |
|------------------------------------------------|----------------------------------------------------------|-------------------|
|                                                | Reaction chamber                                         | Reference chamber |
| 50                                             | 3.9                                                      | 2.9               |
| 80                                             | 2.1                                                      | 2.2               |
| 120                                            | 1.1                                                      | 1.8               |
| 160                                            | 0.5                                                      | 1.6               |
| 200                                            | 0.2                                                      | 1.5               |

113

114

115

116

117 **Table S6. O<sub>3</sub> and NO<sub>2</sub> wall loss from this study (at air flow rate of 5 L min<sup>-1</sup>) and literatures (variable air flow**  
 118 **rate).**

|                           | Reaction chamber | Reference chamber | Literatures / air flow rate                               |
|---------------------------|------------------|-------------------|-----------------------------------------------------------|
| O <sub>3</sub> loss rate  | <3 %             | <3 %              | Cazorla <i>et al.</i> ,2010 / 1.5 L min <sup>-1</sup>     |
|                           | 1.3 %            | 1.4 %             | Sadanaga <i>et al.</i> ,2017 / 0.5 L min <sup>-1</sup>    |
|                           | 5-15 %           | 5-13 %            | Sklaveniti <i>et al.</i> , 2018 / 2.3 L min <sup>-1</sup> |
|                           | 0 %              | 0.7 %             | This study / 5.0 L min <sup>-1</sup>                      |
| NO <sub>2</sub> loss rate | <1 %             | <1 %              | Cazorla <i>et al.</i> ,2010 / 1.5 L min <sup>-1</sup>     |
|                           | insignificant    | insignificant     | Sadanaga <i>et al.</i> ,2017 / 0.5 L min <sup>-1</sup>    |
|                           | <3%              | <3 %              | Sklaveniti <i>et al.</i> , 2018 / 2.3 L min <sup>-1</sup> |
|                           | 0.3 %            | 0.6 %             | This study / 5.0 L min <sup>-1</sup>                      |

119

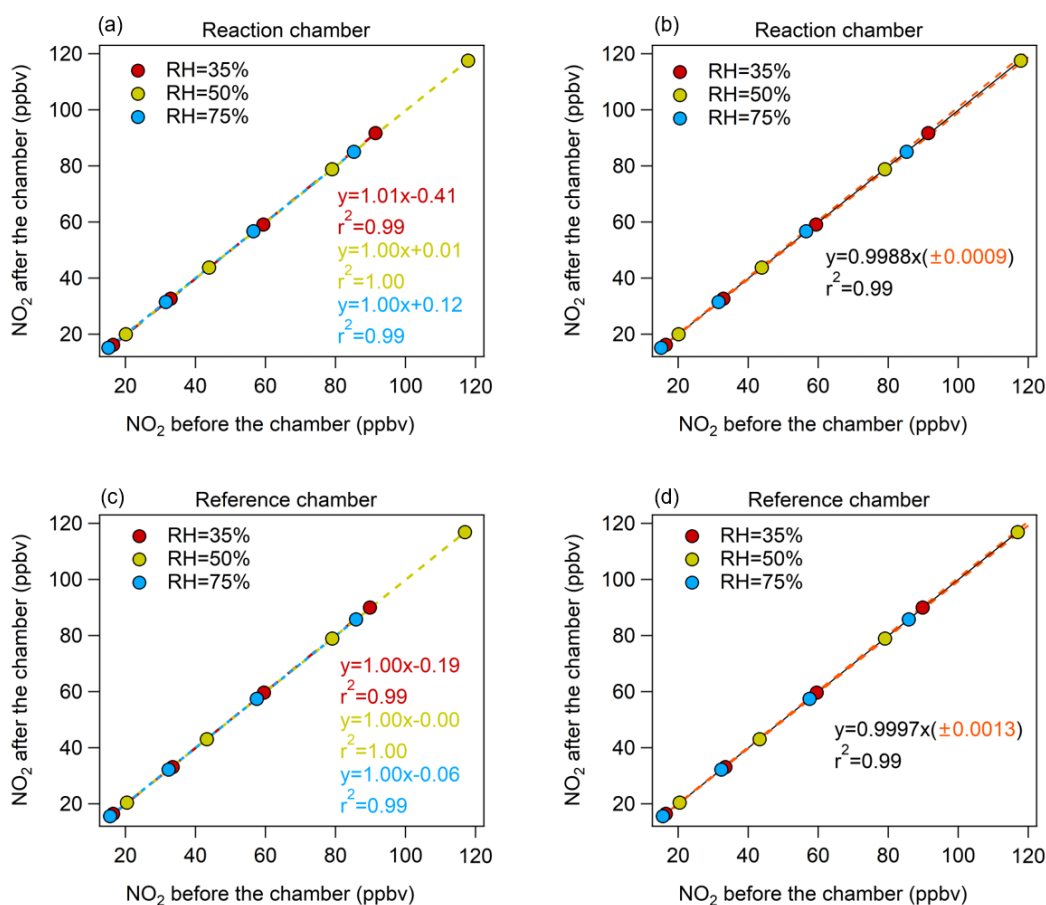

120

121 **Figure. S7 (a) and (c) represent the NO<sub>2</sub> wall loss at different humidities for the reaction and reference**

122 **chambers, respectively, (b) and (d) represent the points fitted to all humidities, respectively. Uncertainty in**

123 **the regression formula was one standard deviation (1 $\sigma$ ).**

124

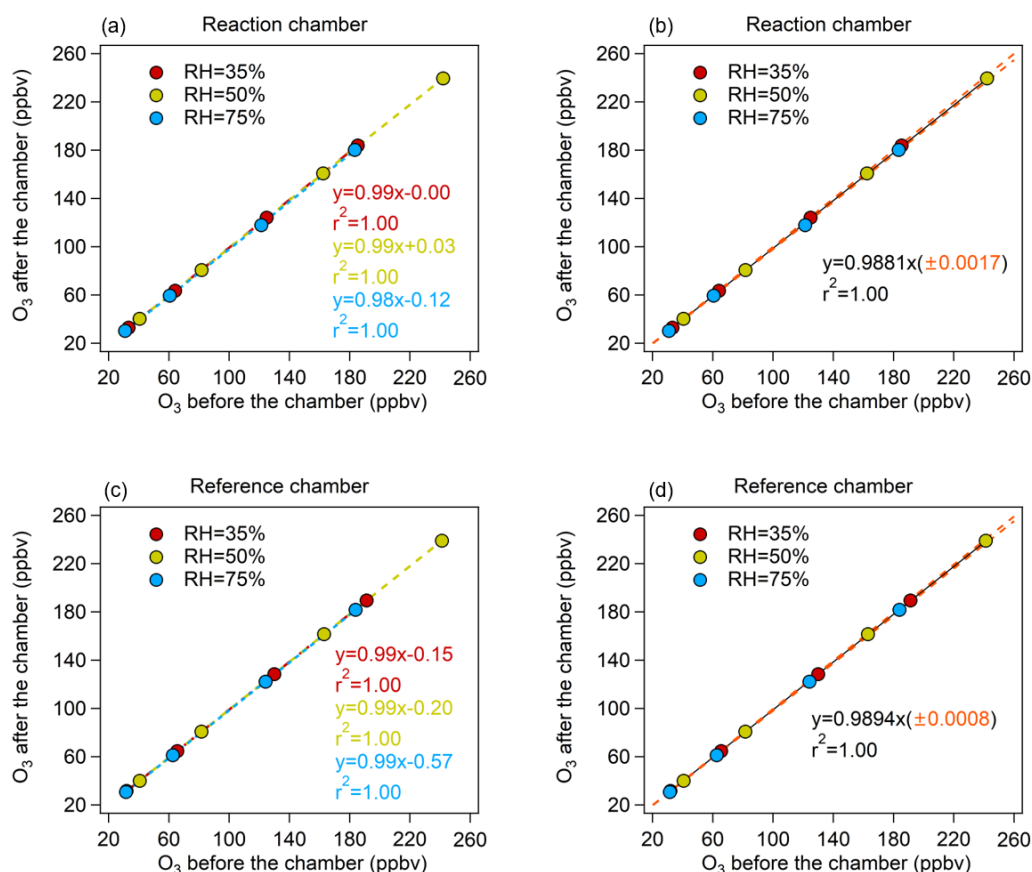

125

126 **Figure. S8 (a) and (c) represent the O<sub>3</sub> wall loss at different humidities for the reaction and reference chambers,**  
 127 **respectively, (b) and (d) represent the points fitted to all humidities, respectively. Uncertainty in the regression**  
 128 **formula was one standard deviation ( $1\sigma$ ).**

129 **1.4 HONO production in the reaction and reference chambers with variations of temperature and**  
 130 **humidities**

131 We tested the HONO production in the reaction and reference chambers under weather conditions similar  
 132 to those during the SZMGT observations (humidities of 60-90% at a temperature of  $\sim 20$  °C and  $J(\text{NO}_2)$   
 133 of  $\sim 0.8 \times 10^{-3} \text{ s}^{-1}$ ) at a  $5 \text{ L min}^{-1}$  sampling flow rate. We found that the HONO mixing ratios in the  
 134 reaction and reference chambers were almost the same and not statistically different from that in the  
 135 ambient air within the standard deviation, as shown in Fig. S9; therefore, we assumed that the HONO  
 136 production in the reaction and reference chambers would not cause a significant difference in  $P(\text{O}_3)_{\text{net}}$  in  
 137 the two chambers.

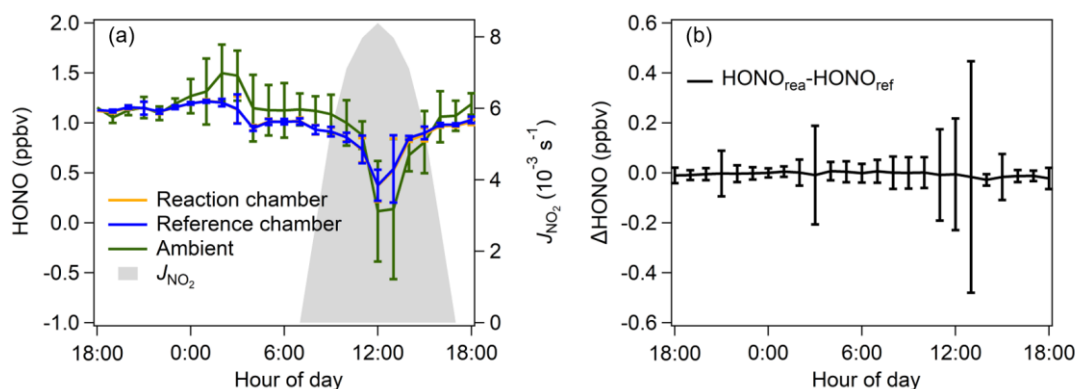

138

139

140

**Figure. S9 (a) The mixing ratios of HONO in the reaction and reference chambers and (b) the difference of HONO mixing ratios the reaction and reference chambers.**

141

### 1.5 The light transmittance in the reaction and reference chambers

142

We measured the transmittivities of all species as follows: we simulated the illumination by adjusting the sun light (SERIC XG-500B) to provide different intensities of illumination to study the solar UV transmittance through the reaction and reference chambers. The photolysis frequencies of the species  $NO_2$ ,  $O_3$ , and HONO, etc. were measured using the Actinic flux spectrometer (PFS-100; Focused Photonics Inc). Measurements are performed in laboratory. The UV blocking of the reference chamber coated with UV protection film was evaluated by comparing the radiation measurements outside the reference chamber with the measurements inside the reference chamber. Similar measurements and comparisons were made for transparent reaction chambers. The results for the reaction and reference chambers are shown in Table S7.

151

According to the working theory of the actinic flux spectrometer, the measurement error may rise from the angular response deviation of the quartz receiver head. According to Bohn et al. (2017), the measurement error of the actinic flux spectrometer can reach  $\pm 5\%$ . According to this, we re-evaluated the transmittivity error listed in Table 1 and Table S7 as follows: ① calculate the absolute measurement error of all measured  $J$  values inside and outside the reaction and reference chambers based on the  $\pm 5\%$  instrument measurement error; ② calculate the average values of all the measured  $J$  values (including ( $J(NO_2)$ ,  $J(O_1D)$ ,  $J(HONO)$ ,  $J(H_2O_2)$ ,  $J(NO_3\_M)$ ,  $J(NO_3\_R)$ ,  $J(HCHO\_M)$ , and  $J(HCHO\_R)$ ) inside and outside the chambers; ③ calculate the propagated error of transmittivity, using the following error propagation equation:

159

$$\sigma_{\text{Transmittivity}} = \sqrt{\left(\frac{\sigma_{J \text{ value in}}}{A_{J \text{ value in}}}\right)^2 + \left(\frac{\sigma_{J \text{ value out}}}{A_{J \text{ value out}}}\right)^2} \quad (\text{S5})$$

where  $\sigma_{\text{Transmittivity}}$  represents the transmittivity error;  $\sigma_{J \text{ value in}}$  and  $\sigma_{J \text{ value out}}$  represent the measurement error of  $J$  value inside and outside the chambers, respectively;  $A_{J \text{ value in}}$  and  $A_{J \text{ value out}}$  represent the average  $J$  values measured inside and outside the chambers, respectively.

164

165 **Table S7. Photolysis frequency  $J$  ( $\text{s}^{-1}$ ) of different species and the transmittivities of  $J$  values in the reaction**  
 166 **and reference chambers. The normal and bold fonts correspond to the transmittivities of  $J$  values in the**  
 167 **reaction (clear) and reference (Utem coated) chambers, respectively. The “transmittivities” column shows the**  
 168 **transmittivities of the tested species from the measurements conducted with the set photolysis frequencies**  
 169 **using SERIC XG-500B sunlight (this study) and ambient (literature). It should be noted that the errors listed**  
 170 **here are relatively large and may not reliable due to a limited number of measurement points (three points**  
 171 **for each species). The calculated transmittivity errors are 0.07 for all species based on the  $\pm 5$  % measurement**  
 172 **error of the instrument.**

173

|                           | Outside Chamber ( $\text{s}^{-1}$ ) | Inside chamber ( $\text{s}^{-1}$ ) | Transmittivities |                                |
|---------------------------|-------------------------------------|------------------------------------|------------------|--------------------------------|
|                           |                                     |                                    | Each experiment  | Averaged                       |
| $J(\text{NO}_2)$          | 6.068E-03                           | 5.744E-03                          | 0.947            |                                |
|                           | 8.418E-03                           | 8.598E-03                          | 1.021            | 0.985                          |
|                           | 1.360E-02                           | 1.344E-02                          | 0.988            | $\pm 0.037$                    |
|                           | <b>5.996E-03</b>                    | <b>4.700E-04</b>                   | <b>0.078</b>     |                                |
|                           | <b>1.064E-02</b>                    | <b>1.134E-03</b>                   | <b>0.107</b>     | <b>0.094</b>                   |
|                           | <b>1.382E-02</b>                    | <b>1.324E-03</b>                   | <b>0.095</b>     | <b><math>\pm 0.014</math></b>  |
| $J(\text{O}^1\text{D})$   | 5.609E-05                           | 5.484E-05                          | 0.978            |                                |
|                           | 1.088E-04                           | 1.151E-04                          | 1.050            | 1.020                          |
|                           | 1.240E-04                           | 1.240E-04                          | 1.000            | $\pm 0.04$                     |
|                           | <b>7.005E-05</b>                    | <b>6.750E-07</b>                   | <b>0.010</b>     |                                |
|                           | <b>9.825E-05</b>                    | <b>3.016E-06</b>                   | <b>0.031</b>     | <b>0.019</b>                   |
|                           | <b>1.243E-04</b>                    | <b>2.205E-06</b>                   | <b>0.018</b>     | <b><math>\pm 0.011</math></b>  |
| $J(\text{HONO})$          | 1.058E-03                           | 9.994E-04                          | 0.944            |                                |
|                           | 1.468E-03                           | 1.494E-03                          | 1.018            | 0.983                          |
|                           | 2.376E-03                           | 2.344E-03                          | 0.986            | $\pm 0.037$                    |
|                           | <b>1.047E-03</b>                    | <b>2.154E-06</b>                   | <b>0.002</b>     |                                |
|                           | <b>1.281E-03</b>                    | <b>2.588E-06</b>                   | <b>0.002</b>     | <b>0.002</b>                   |
|                           | <b>2.417E-03</b>                    | <b>5.596E-06</b>                   | <b>0.002</b>     | <b><math>\pm 0.0002</math></b> |
| $J(\text{H}_2\text{O}_2)$ | 6.157E-06                           | 5.818E-06                          | 0.944            | 1.000                          |

|                               |                  |                  |               |                |
|-------------------------------|------------------|------------------|---------------|----------------|
|                               | 1.370E-05        | 1.356E-05        | 0.990         | ±0.060         |
|                               | 1.200E-05        | 1.279E-05        | 1.065         |                |
|                               | <b>6.145E-06</b> | <b>3.451E-08</b> | <b>0.006</b>  |                |
|                               | <b>1.080E-05</b> | <b>4.942E-08</b> | <b>0.005</b>  | <b>0.005</b>   |
|                               | <b>1.393E-05</b> | <b>6.160E-08</b> | <b>0.004</b>  | <b>±0.0006</b> |
| <i>J</i> (NO <sub>3</sub> _M) | 1.314E-02        | 1.277E-02        | 0.971         |                |
|                               | 2.983E-02        | 2.993E-02        | 1.003         | 1.002          |
|                               | 1.849E-02        | 1.906E-02        | 1.086         | ±0.030         |
|                               | <b>1.284E-02</b> | <b>9.929E-03</b> | <b>0.773</b>  |                |
|                               | <b>2.342E-02</b> | <b>2.437E-02</b> | <b>1.041</b>  | <b>0.916</b>   |
|                               | <b>3.040E-02</b> | <b>2.839E-02</b> | <b>0.934</b>  | <b>±0.134</b>  |
| <i>J</i> (NO <sub>3</sub> _R) | 9.881E-02        | 9.575E-02        | 0.970         |                |
|                               | 2.224E-01        | 2.226E-01        | 1.001         | 0.999          |
|                               | 1.386E-01        | 1.425E-01        | 1.028         | ±0.030         |
|                               | <b>9.669E-02</b> | <b>7.461E-02</b> | <b>0.772</b>  |                |
|                               | <b>1.751E-01</b> | <b>1.814E-01</b> | <b>1.036</b>  | <b>0.913</b>   |
|                               | <b>2.268E-01</b> | <b>2.113E-01</b> | <b>0.932</b>  | <b>±0.030</b>  |
| <i>J</i> (HCHO_M)             | 2.645E-05        | 2.492E-05        | 0.942         |                |
|                               | 5.927E-05        | 5.845E-05        | 0.986         | 0.997          |
|                               | 5.188E-05        | 5.514E-05        | 1.063         | ±0.006         |
|                               | <b>2.626E-05</b> | <b>1.017E-07</b> | <b>0.0038</b> |                |
|                               | <b>4.643E-05</b> | <b>1.810E-08</b> | <b>0.0004</b> | <b>0.0015</b>  |
|                               | <b>6.026E-05</b> | <b>1.620E-08</b> | <b>0.0003</b> | <b>±0.002</b>  |
| <i>J</i> (HCHO_R)             | 5.800E-05        | 5.737E-05        | 0.989         |                |
|                               | 5.081E-05        | 5.394E-05        | 1.062         | 1.021          |
|                               | 3.594E-05        | 3.617E-05        | 1.007         | ±0.004         |
|                               | <b>3.174E-05</b> | <b>2.670E-09</b> | <b>~0</b>     |                |
|                               | <b>4.561E-05</b> | <b>1.800E-07</b> | <b>0.0039</b> | <b>0.0026</b>  |
|                               | <b>5.892E-05</b> | <b>2.290E-07</b> | <b>0.0039</b> | <b>±0.002</b>  |

---

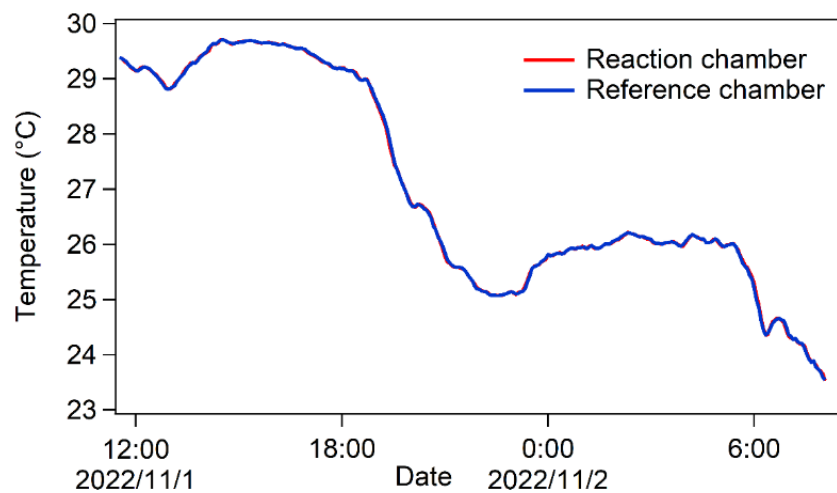

175

176

177

**Figure S10. Air temperature in the reaction and reference chambers during the ambient field observation on Panyu campus of Jinan University.**

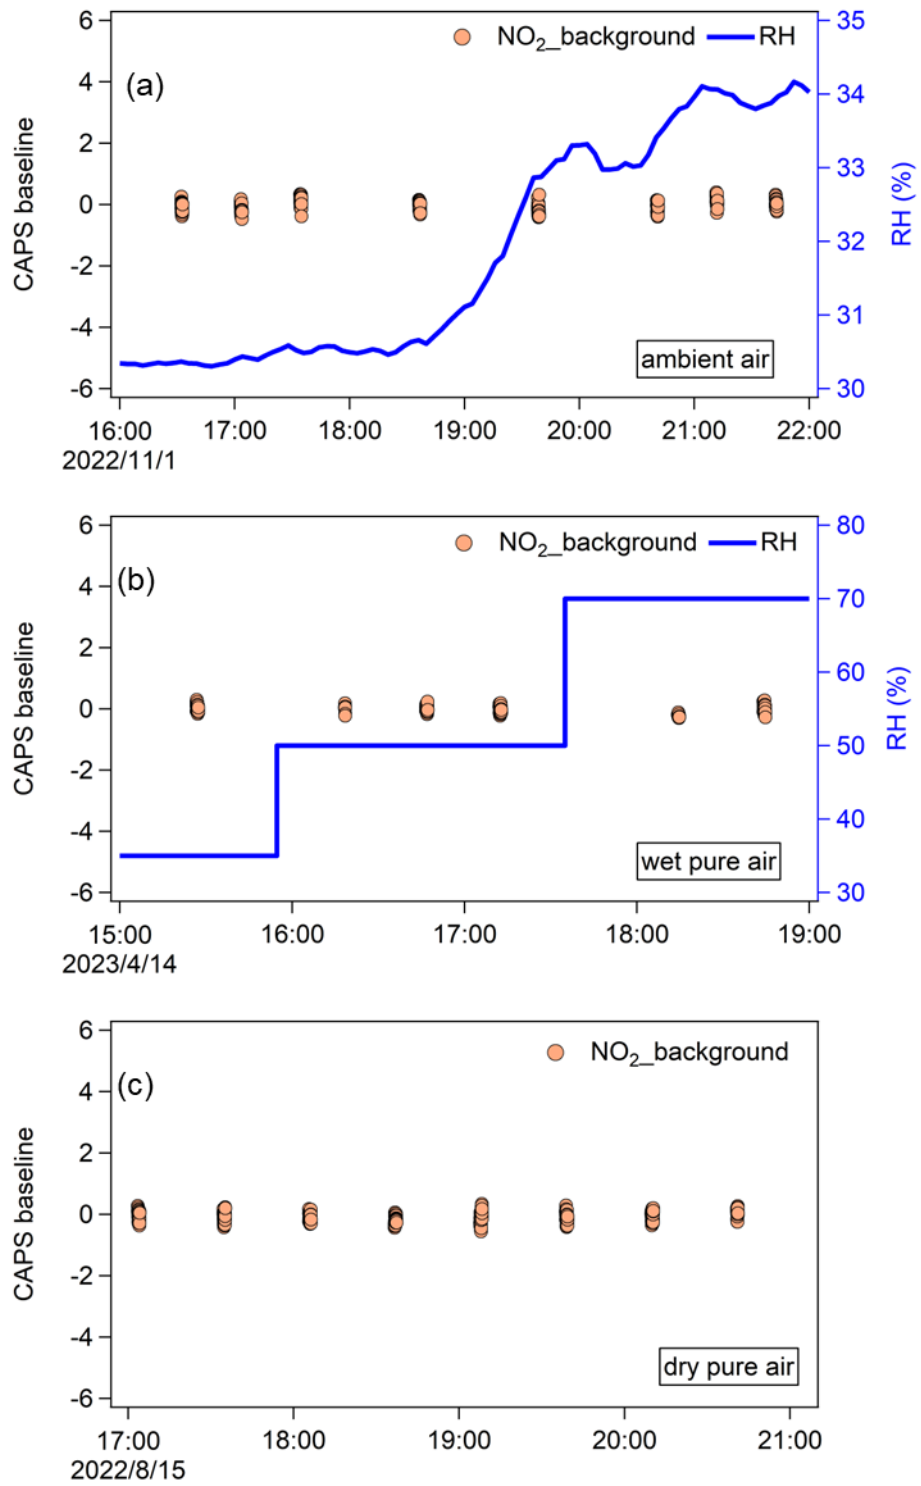

178

179

Figure S11. Time series of CAPS baseline and RH when measuring ambient air (a), and when injecting wet (b) and dry (c) pure air in the laboratory, respectively.

180

181



182 **1.5 The quantitative conversion efficiency of O<sub>3</sub> to NO<sub>2</sub> ( $\alpha$ ) in the NO-reaction chamber**

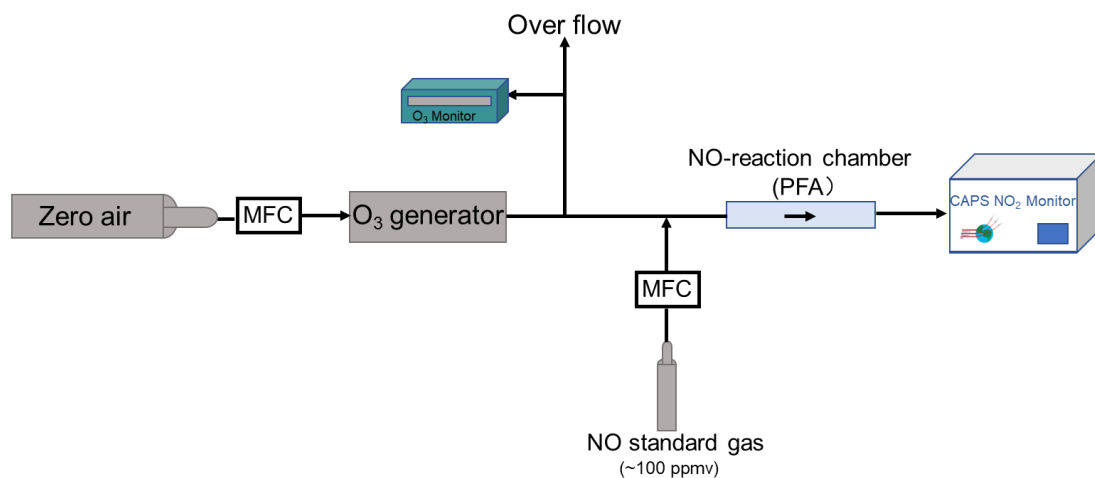

183  
184 **Figure S12: Schematic diagram for measuring O<sub>3</sub> to NO<sub>2</sub> conversion efficiency in the NO-reaction chamber**  
185 **(MFC: Mass Flow Controller).**

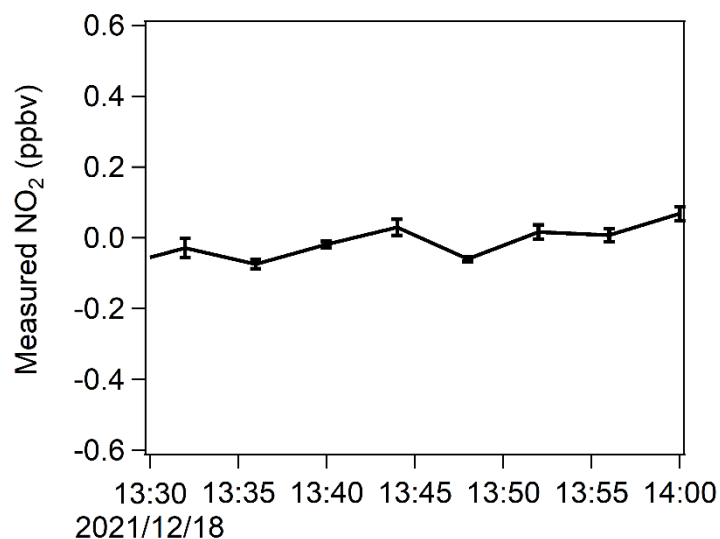

186  
187 **Figure S13 Time series of NO<sub>2</sub> when injecting NO into CAPS-NO<sub>2</sub> monitor.**

188 **1.6 The airtightness of the reaction and reference chambers**

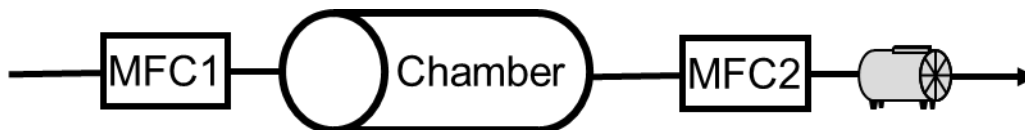

189  
190  
191 **Figure S14. Schematic diagram for investigating the airtightness of the reaction and reference chambers,**  
192 **where MFC1 could measure air flow rate and pressure at the chamber inlet, MFC2 could measure air flow**  
193 **rate and pressure at the chamber outlet.**

194

195 **Table S8: Airtightness estimate of the reaction and reference chambers by testing the differences of (air flow**  
 196 **rate × gas pressure) at the inlet and outlet of the reaction and reference chambers.**

|                   | Inlet flow rate (L min <sup>-1</sup> ) | Inlet pressure (PSIA) | Inlet flow rate × Inlet pressure | Outlet flow rate (L min <sup>-1</sup> ) | Outlet pressure (PSIA) | Outlet flow rate × Outlet pressure | $\Delta$ (Air flow rate × Pressure) (Difference at inlet and outlet)/ (Inlet flow rate × Inlet pressure) (%) |
|-------------------|----------------------------------------|-----------------------|----------------------------------|-----------------------------------------|------------------------|------------------------------------|--------------------------------------------------------------------------------------------------------------|
| Reaction chamber  | 3.80                                   | 14.67                 | 55.74                            | 3.81                                    | 14.63                  | 55.74                              | 0.00                                                                                                         |
|                   | 3.46                                   | 13.48                 | 46.64                            | 3.51                                    | 13.43                  | 47.14                              | 1.07                                                                                                         |
|                   | 3.19                                   | 12.51                 | 39.90                            | 3.22                                    | 12.42                  | 39.99                              | 0.22                                                                                                         |
|                   | 2.93                                   | 11.54                 | 33.81                            | 3.00                                    | 11.53                  | 34.59                              | 2.33                                                                                                         |
| Reference chamber | 3.80                                   | 14.68                 | 55.78                            | 3.80                                    | 14.61                  | 55.52                              | 0.47                                                                                                         |
|                   | 3.33                                   | 13.04                 | 43.42                            | 3.38                                    | 13.00                  | 43.94                              | 1.20                                                                                                         |
|                   | 3.12                                   | 12.3                  | 38.37                            | 3.16                                    | 12.14                  | 38.36                              | 0.03                                                                                                         |
|                   | 2.83                                   | 11.25                 | 31.84                            | 2.91                                    | 11.24                  | 32.71                              | 2.73                                                                                                         |

197 **S2: The LOD and measurement error of the NPOPR detection system.**

198 **Table S9. The upper limit values of LODs of the CAPS-NO<sub>2</sub> monitor for the reaction chamber, reference**  
 199 **chamber, and  $P(O_3)_{net}$  at different flow rates.**

200

| Flow rate of air (L min <sup>-1</sup> ) | LOD ( $3\sigma$ )       |                          |                                        |
|-----------------------------------------|-------------------------|--------------------------|----------------------------------------|
|                                         | Reaction chamber (ppbv) | Reference chamber (ppbv) | $P(O_3)_{net}$ (ppbv h <sup>-1</sup> ) |
| 1.3                                     | 0.02                    | 0.02                     | 0.07                                   |
| 3                                       | 0.10                    | 0.10                     | 1.4                                    |
| 5                                       | 0.13                    | 0.07                     | 2.3                                    |

201

202 The  $P(O_3)_{net}$  error was calculated according the instrumental error of the CAPS-NO<sub>2</sub> monitor and  
 203 the O<sub>3</sub> light-enhanced loss in the reaction and reference chambers. More details are described as follows:

204 **Calibration of CAPS NO<sub>2</sub> monitor** CAPS NO<sub>2</sub> monitor was used to measure the NO<sub>2</sub> standard gas  
 205 after we have calibrated it using the gas-phase titration method using NO and O<sub>3</sub>. We used the CAPS-  
 206 NO<sub>2</sub> monitor reading as a transition value between the two to obtain the NO<sub>2</sub> standard gas and NO+O<sub>3</sub>  
 207 mixing ratios corresponding to the same CAPS-NO<sub>2</sub> monitor reading. Results showed the purification of  
 208 NO<sub>2</sub> standard gas was good enough to calibrate CAPS-NO<sub>2</sub> monitor, as shown in Fig. S15

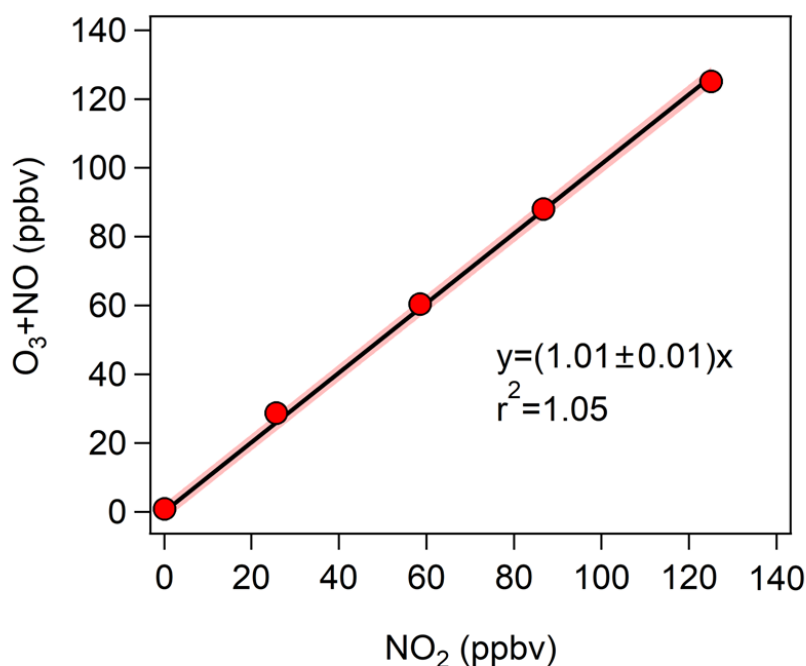

209

210 **Figure. S15 Correlation between NO<sub>2</sub> standard gas and the NO<sub>2</sub> generated using the gas-phase titration**  
 211 **method (NO + O<sub>3</sub>).**

212 *The instrumental error of CAPS-NO<sub>2</sub> monitor* ( $(O_{X_{CAPS}})_{error}$ ) was calculated from the fluctuation  
 213 range of the 68.3 % confidence interval of the calibration curve as shown in Fig. 4, the relationship  
 214 between the  $(O_{X_{CAPS}})_{error}$  and the measured Ox value ( $f_{measured}$ ) can be expressed as a power function  
 215 curve, as shown in Eq. (S6):

$$216 \quad (O_{X_{CAPS}})_{error} = 9.72 f_{measured}^{-1.0024} \quad (S6)$$

217 *The light-enhanced loss of O<sub>3</sub> in the reaction and reference chambers* at 5 L min<sup>-1</sup> (the ambient  
 218 observation used flow rate in this study) were investigated by carrying out the following experiment:  
 219 injecting the O<sub>3</sub> with a mixing ratio of about 130 ppbv generated by the O<sub>3</sub> generator (P/N 97-0067-02,  
 220 Analytic Jena US, USA) to ensure that no photochemical O<sub>3</sub> was produced during the outdoor experiment.  
 221 The  $J(O^1D)$ ,  $T$ , RH,  $P$ , and O<sub>3</sub> mixing ratios at the inlet and outlet of the reaction and reference chambers  
 222 were measured simultaneously. The  $T$  and RH were measured by the thermometer (Vaisala, HMP110,  
 223 USA). The light-enhanced loss coefficient of O<sub>3</sub> ( $\gamma$ ) was calculated using Eq. (S7), the relationship of  
 224  $J(O^1D)$  with  $\gamma$  is shown in Fig. S16a. The obtained  $\gamma$  - $J(O^1D)$  equation listed in Eq. (S7) was used to  
 225 correct the light-enhanced loss of O<sub>3</sub> in the reaction and reference chambers during the daytime to  
 226 excluded the influence of light-enhanced loss.

$$227 \quad \gamma = \frac{d[\text{O}_3] \times D}{\omega \times [\text{O}_3] \times \tau} \quad (S7)$$

228 where  $d[\text{O}_3]$  represents the difference between the  $\text{O}_3$  mixing ratios at the inlet and outlet of the reaction  
 229 and reference chambers,  $D$  is the diameter of the chambers,  $\omega$  is the average velocity of  $\text{O}_3$  molecules,  
 230  $[\text{O}_3]$  is the injected  $\text{O}_3$  mixing ratio at the inlet of the reaction and reference chambers, and  $\tau$  is the  
 231 average residence time of the air in the reaction and reference chambers.

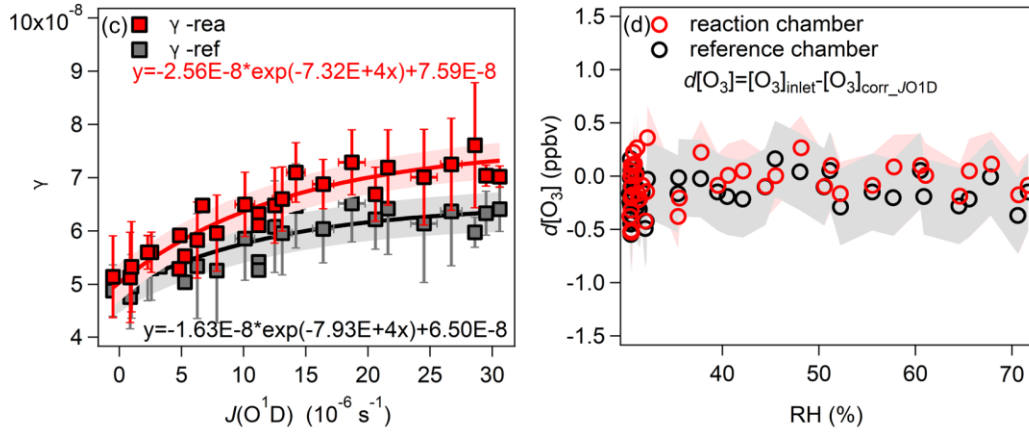

232  
 233 **Figure S16: The relationship of (a)  $\gamma$  and  $J(\text{O}^1\text{D})$  and (b) RH and  $d[\text{O}_3]$  in the reaction and reference**  
 234 **chambers, which is calculated from the 68.3 % confidence interval of the fitting lines between  $\gamma$  and  $J(\text{O}^1\text{D})$ ,**  
 235 **the shaded areas represented the maximum fluctuation range under this confidence level.**

236 When quantifying the light-enhanced  $\text{O}_3$  loss ( $d[\text{O}_3]$ ) during ambient air measurement, we first  
 237 calculate  $\gamma$  using the measured  $J(\text{O}^1\text{D})$  and the  $\gamma - J(\text{O}^1\text{D})$  equations listed in Fig. S16a in the reaction  
 238 and reference chambers, then using the measured  $[\text{O}_3]$  and Eq. (S7) to calculate  $d[\text{O}_3]$ .

239 The  $\text{O}_3$  mixing ratio change after the correction of the light-enhanced loss of  $\text{O}_3$  ( $d[\text{O}_3]$ ) showed no  
 240 clear correlation with RH for both reaction and reference chambers, as shown in Fig. S16b, which  
 241 indicates that the RH had no influence to the  $\text{O}_3$  mixing ratio change during the observation period. It  
 242 should be noted that the final error of Ox of the reaction and reference chambers includes the  
 243 measurement error of CAPS- $\text{NO}_2$  monitor (calculated by Eq. (S6)) and the error caused by  $\gamma$ , so the  
 244 measured  $P(\text{O}_3)_{\text{net}}$  error can be calculated according to Eq. (7) in manuscript.

$$245 \quad (\text{O}_X)_{\text{error}} = \sqrt{(\text{O}_{X\gamma})_{\text{error}}^2 + (\text{O}_{XCAPS})_{\text{error}}^2} \quad (S8)$$

246 where  $(\text{O}_{X\gamma})_{\text{error}}$  represents the error of the Ox of the reaction and reference chambers corrected by  $\gamma$ .

247

248 **S3: Supplement materials for the field observations.**

249 Figure S17 shows the measurement site of the observation campaign, conducted at the Shenzhen  
250 Meteorological Gradient Tower (SZMGT), which is located in Shenzhen, Pearl River Delta (PRD) region  
251 in China.

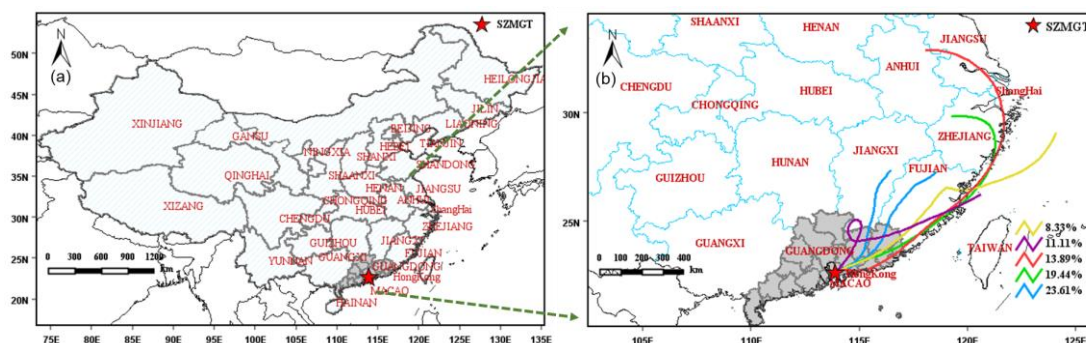

252  
253  
254 **Figure S17: (a)The geographic location of the measurement site and (b) the integrated ambient air backward**  
255 **trajectories during sampling period from 7 December, 00:00 to 10 December 2021, 00:00 in Shenzhen (China).**  
256 **The above figures were obtained by using the MeteInfo weather mapping software in the TrajStat plugin**  
257 **(Deshpande et al., 2016; Hao et al., 2020). Figure S17b was obtained by the Internet-based Hybrid-Single**  
258 **Particle Lagrangian Integrated Trajectory (HYSPLIT) Model, the required data was downloaded via**  
259 **ftp://arlftp.arlhq.noaa.gov/pub/archives/gdas1 (NOAA). Frequency grid resolution:  $5.0^{\circ} \times 5.0^{\circ}$ , trajectory**  
260 **duration: 72 h. The air mass during the campaign were mainly from Jiangxi and Fujian, which had a 23.61 %**  
261 **probability, followed by Zhejiang, Anhui, east coast, and East China Sea, which had 19.44 %, 13.89 %, 11.11 %, and 8.33 %**  
262 **probability, respectively.**

263  
264  
265  
266  
267  
268  
269  
270  
271  
272  
273  
274  
275  
276  
277  
278  
279  
280

281

**Table S10a: Summary of maximum  $P(O_3)_{net}$  of field measurements in literatures.**

| Measurement site                    | The type of site                                                     | Time                     | $P(O_3)_{net}$ (ppbv h <sup>-1</sup> ) | Reference               |
|-------------------------------------|----------------------------------------------------------------------|--------------------------|----------------------------------------|-------------------------|
| Wakayama, Kyoto, Japan              | remote area                                                          | 27 July to 8 August 2014 | 10.5 ppbv h <sup>-1</sup>              | Sadanaga et al., 2017   |
| State College, Pennsylvania, U.S.A. | urban area                                                           | Summer 2008              | ~30 ppbv h <sup>-1</sup>               | Cazorla et al., 2010    |
| Houston, Texas, U.S.A.              | urban area                                                           | October 2013             | 40-50 ppbv h <sup>-1</sup>             | Baier et al., 2015      |
| Bloomington, Indiana, U.S.A.        | a site 2.5 km northeast of the Indiana University Bloomington campus | 30 May 2010              | ~30 ppbv h <sup>-1</sup>               | Sklaveniti et al., 2018 |
| Houston, Texas, U.S.A.              | urban area                                                           | 15 April to 31 May 2009  | 100 ppbv h <sup>-1</sup>               | Ren et al., 2013        |
| Shenzhen, Guangdong, China          | a village in Bao'an district                                         | 7 to 9 December 2021     | 34.1 ppbv h <sup>-1</sup>              | This study              |

282

283

**Table S10b: Summary of maximum  $P(O_3)_{net}$  of model simulation in literatures.**

284

| Site                    | The type of site                                                             | Time                          | $P(O_3)_{net}$ (ppbv h <sup>-1</sup> ) | Reference                            |
|-------------------------|------------------------------------------------------------------------------|-------------------------------|----------------------------------------|--------------------------------------|
| Fukue Island, Japan     | a remote area                                                                | May to June 2009              | 1-2 ppbv h <sup>-1</sup>               | Kanaya et al., 2016                  |
| Chelmsford, Essex, U.K. | a site 2 miles west of Chelmsford in Essex and 25 miles north east of London | Summer 2003                   | 7.2 ppbv h <sup>-1</sup>               | Emmerson et al., 2007                |
| Houston, Texas, U.S.A.  | suburban area                                                                | the September 2013            | ~10 ppbv h <sup>-1</sup>               | Mazzuca et al., 2016                 |
| Houston, Texas, U.S.A.  | urban area                                                                   | from 15 April to 31 May 2009  | 15-20 ppbv h <sup>-1</sup>             | Ren et al., 2013                     |
| Houston, Texas, U.S.A.  | urban area                                                                   | from August to September 2006 | 45 ppbv h <sup>-1</sup>                | Chen et al., 2010; Chen et al., 2012 |
| Houston, Texas, U.S.A.  | urban area                                                                   | September 2013                | ~30 ppbv h <sup>-1</sup>               | Mazzuca et al., 2016                 |

285

286 **S4: Supplement materials for the MCM modeling.**287 **Table S11. VOCs mixing ratios during 7- 9 December 2021 in SZMGT (units: pptv) used by the model.**

| Chemicals               | Classification | Mean±SD<br>(pptv) | Chemicals                  | Classification | Mean±SD<br>(pptv) |
|-------------------------|----------------|-------------------|----------------------------|----------------|-------------------|
| Alkanes                 |                | 30516±27079       | Aromatics                  |                | 7098±5855         |
| <i>n</i> -butane        | NMHC           | 8803±6422         | toluene                    | NMHC           | 3684±2688         |
| propane                 | NMHC           | 7086±5169         | <i>m/p</i> -xylene         | NMHC           | 1392±1370         |
| isobutane               | NMHC           | 4983±3635         | ethylbenzene               | NMHC           | 591±582           |
| ethane                  | NMHC           | 3461±2525         | <i>o</i> -xylene           | NMHC           | 572±563           |
| isopentane              | NMHC           | 1712±1249         | benzene                    | NMHC           | 528±336           |
| <i>n</i> -pentane       | NMHC           | 1570±1146         | styrene                    | NMHC           | 159±191           |
| <i>n</i> -hexane        | NMHC           | 633±462           | 1,2,4-<br>trimethylbenzene | NMHC           | 39±29             |
| 2-methylpentane         | NMHC           | 473±345           | <i>m</i> -ethyltoluene     | NMHC           | 38±28             |
| 3-methylpentane         | NMHC           | 423±308           | <i>p</i> -ethyltoluene     | NMHC           | 21±15             |
| 3-methylhexane          | NMHC           | 252±184           | <i>n</i> -propylbenzene    | NMHC           | 21±15             |
| 2-methylhexane          | NMHC           | 195±142           | <i>o</i> -ethyltoluene     | NMHC           | 20±15             |
| <i>n</i> -heptane       | NMHC           | 178±130           | isopropylbenzene           | NMHC/          | 13±10             |
| methylcyclopentane      | NMHC           | 125±91            | 1,2,3-<br>trimethylbenzene | NMHC           | 12±9              |
| 2,3-dimethylbutane      | NMHC           | 122±89            | 1,3,5-<br>trimethylbenzene | NMHC           | 7±5               |
| <i>n</i> -octane        | NMHC           | 109±80            | OVOCs                      |                | 40695±2718<br>0   |
| methylcyclohexane       | NMHC           | 102±74            | formaldehyde               | OVOCs          | 10558±5113        |
| 2,2-dimethylbutane      | NMHC           | 71±52             | ethanol                    | OVOCs          | 10537±7136        |
| <i>n</i> -dodecane      | NMHC           | 68±50             | methanol                   | OVOCs          | 10320±6944        |
| <i>n</i> -decane        | NMHC           | 49±35             | acetone                    | OVOCs          | 5701±4024         |
| <i>n</i> -nonane        | NMHC           | 47±34             | hydroxyacetone             | OVOCs          | 4542±3227         |
| <i>n</i> -undecane      | NMHC           | 41±30             | acetaldehyde               | OVOCs          | 3010±1939         |
| Alkenes                 |                | 2419±2086         | methyl ethyl ketone        | OVOCs          | 2714±2277         |
| ethylene                | NMHC           | 1493±1089         | acrolein                   | OVOCs          | 605±244           |
| propylene               | NMHC           | 411±300           | methyl vinyl ketone        | OVOCs          | 185±101           |
| isoprene                | BVOCs          | 351±182           | methacrylaldehyde          | OVOCs          | 128±70            |
| 1-butene                | NMHC           | 163±119           | <i>m</i> -cresol           | OVOCs          | 46±43             |
| 1-pentene               | NMHC           | 29±21             | phenol                     | OVOCs          | 26±26             |
| 1-hexene                | NMHC           | 15±11             |                            |                |                   |
| <i>trans</i> -2-butene  | NMHC           | 11±8              |                            |                |                   |
| <i>cis</i> -2-butene    | NMHC           | 11±8              |                            |                |                   |
| <i>trans</i> -2-pentene | NMHC           | 5±3               |                            |                |                   |
| <i>cis</i> -2-pentene   | NMHC           | 3±2               |                            |                |                   |
| Acetylene               |                | 1858±1356         |                            |                |                   |
| Acetylene               | NMHC           | 1858±1356         |                            |                |                   |

288 \*NMHC: non-methane hydrocarbon, BVOCs: biogenic volatile organic compounds, OVOCs: oxygenated  
289 volatile organic compounds.

290 **4.1  $J$  values used in the MCM model simulation**

291 The  $J$  values obtained from two methods (labeled as method I and II) were used in the 3<sup>rd</sup>-stage 4-  
 292 min simulation. The Tropospheric Ultraviolet and Visible (TUV) radiation model (version 5.3) (Lantz et  
 293 al., 1996; Madronich and Flocke, 1999) was used to provide a representative spectral actinic flux in these  
 294 two methods. The photolysis frequencies of each measured species used in TUV model ( $J_{\text{value TUV}}$ ) were  
 295 calculated by numerical summation over wavelength (Calvert et al., 2002):

$$296 J_{\text{value TUV}} = \int_a^b \delta_i \times \phi_i \times F_i \Delta\lambda_i \quad (\text{S9})$$

297 where  $a$  and  $b$  represent the range of the set wavelength,  $\delta_i$ ,  $\phi_i$ , and  $F_i$  stand for the absorption cross  
 298 section, quantum yield, and spectral actinic flux of the species  $i$ , respectively. The spectral actinic flux  
 299 was obtained from the TUV model, detailed information of these two methods is described in Tables S12  
 300 and S13.

301 **Table S12.  $J$  values used in the model simulation in reaction and reference chambers.**

| $J$ values used in the model simulation |                                                                                                                                                                                                              |                                                                                                                                                                                                                                                                          |
|-----------------------------------------|--------------------------------------------------------------------------------------------------------------------------------------------------------------------------------------------------------------|--------------------------------------------------------------------------------------------------------------------------------------------------------------------------------------------------------------------------------------------------------------------------|
|                                         | Measured $J$ values: $J(\text{NO}_2)$ , $J(\text{O}^1\text{D})$ , $J(\text{HONO})$ ,<br>$J(\text{H}_2\text{O}_2)$ , $J(\text{NO}_3\_M)$ , $J(\text{NO}_3\_R)$ , $J(\text{HCHO\_M})$ ,<br>$J(\text{HCHO\_R})$ | Unmeasured $J$ values: $J(\text{HNO}_3)$ , $J(\text{CH}_3\text{CHO})$ ,<br>$J(\text{MACR})$ , $J(\text{MEK})$ , $J(\text{HOCH}_2\text{CHO})$ ,<br>$J(\text{C}_2\text{H}_5\text{CHO})$ , $J(\text{C}_3\text{H}_7\text{CHO})$ , $J(\text{C}_4\text{H}_9\text{CHO})$ , etc. |
| Method I                                | $J_{\text{trans measured}} \times J_{\text{value measured}}$                                                                                                                                                 | $J_{\text{trans TUV}} \times J_{\text{NO2 measured}} / J_{\text{NO2 TUV}} \times J_{\text{value TUV}}$                                                                                                                                                                   |
| Method II                               | $J_{\text{trans TUV}} \times J_{\text{value TUV}}$                                                                                                                                                           | $J_{\text{trans TUV}} \times J_{\text{NO2 measured}} / J_{\text{NO2 TUV}} \times J_{\text{value TUV}}$                                                                                                                                                                   |

302 \* $J_{\text{value measured}}$  and  $J_{\text{value TUV}}$  represent the measured and TUV modeled  $J$  values of different species, respectively.  
 303  $J_{\text{trans measured}}$  represents the measured transmittivities of each measured species in the reaction and reference chambers,  
 304 which are listed in Table S7;  $J_{\text{trans TUV}}$  represents the transmittivities of each measured species used in TUV model  
 305 in the reaction and reference chambers, where the  $J_{\text{trans TUV}}$  in the reaction chamber is regarded as 100 %  $J_{\text{trans TUV}}$ ,  
 306 in the reference chamber is calculated as  $\frac{J_{\text{TUV}290-790\text{ nm}}}{J_{\text{TUV}290-790\text{ nm}}}$ , where  $J_{\text{TUV}290-790\text{ nm}}$  equals to the  $J$  value at the wavelength of 390–  
 307 790 nm,  $J_{\text{TUV}290-790\text{ nm}}$  equals to the  $J$  value at the wavelength of 290–790 nm, the detailed  $J_{\text{trans TUV}}$  values of different  
 308 species are shown in Table S13;  $J_{\text{NO2 measured}}$  and  $J_{\text{NO2 TUV}}$  represent the measured and TUV modeled  $J_{\text{NO2}}$ .

309  
 310 **Table S13. The transmittivities of  $J$  values used in TUV model ( $J_{\text{trans TUV}}$ ) described in Table S12.**

|                   | Transmittivities |                         |                  |                           |                     |                     |                     |                     |
|-------------------|------------------|-------------------------|------------------|---------------------------|---------------------|---------------------|---------------------|---------------------|
|                   | $J(\text{NO}_2)$ | $J(\text{O}^1\text{D})$ | $J(\text{HONO})$ | $J(\text{H}_2\text{O}_2)$ | $J(\text{NO}_3\_M)$ | $J(\text{NO}_3\_R)$ | $J(\text{HCHO\_M})$ | $J(\text{HCHO\_R})$ |
| Reaction chamber  | 1.00             | 1.00                    | 1.00             | 1.00                      | 1.00                | 1.00                | 1.00                | 1.00                |
| Reference chamber | 0.30             | 0.00                    | 0.01             | 0.00                      | 1.00                | 1.00                | 0.01                | 0.01                |



311 **4.2 The modeling results by using  $J$  values obtained from method II**

312 The variations in the radical mixing ratios (i.e., HO<sub>2</sub>, OH, RO<sub>2</sub>) and NO<sub>3</sub>, NO, NO<sub>2</sub>, and O<sub>3</sub> mixing  
 313 ratios obtained from method I and method II during the 3<sup>rd</sup>-stage 4-min model simulation are shown in  
 314 Fig. 8 and Fig. S18, respectively. The production and destruction reactions of HO<sub>2</sub>, OH, RO<sub>2</sub>, and NO<sub>3</sub>  
 315 in the reaction and reference chambers obtained from methods I and II are shown in Fig. 9 and Fig. S19,  
 316 respectively, the production and destruction reactions of RO<sub>x</sub> in the reaction and reference chambers  
 317 obtained from methods I and II are shown in Fig. S20, the detailed RO<sub>x</sub> production pathways of  
 318 NO<sub>3</sub>+VOCs are shown in Fig. S21, and the final modeling results are shown in Fig. 10 and Fig. S22.

319 From Fig. S18, in the reaction chamber, HO<sub>2</sub>, OH, RO<sub>2</sub>, and NO<sub>3</sub> mixing ratios increased slightly  
 320 in the first few seconds and then became stable, their final concentrations were  $1.97 \times 10^8$ ,  $7.61 \times 10^6$ ,  
 321  $1.06 \times 10^8$ , and  $8.36 \times 10^6$  molecules cm<sup>-3</sup>, respectively. In the reference chamber, HO<sub>2</sub>, OH, and RO<sub>2</sub>  
 322 concentrations declined in the 1<sup>st</sup> 20 seconds and then gradually became stable, their final concentrations  
 323 were  $8.11 \times 10^7$ ,  $1.08 \times 10^6$ , and  $5.68 \times 10^7$  molecules cm<sup>-3</sup>, respectively. On the contrary, the NO<sub>3</sub> mixing  
 324 ratio slightly increased at the 1<sup>st</sup> 1-2 min and then became stable at  $1.88 \times 10^7$  molecules cm<sup>-3</sup>.

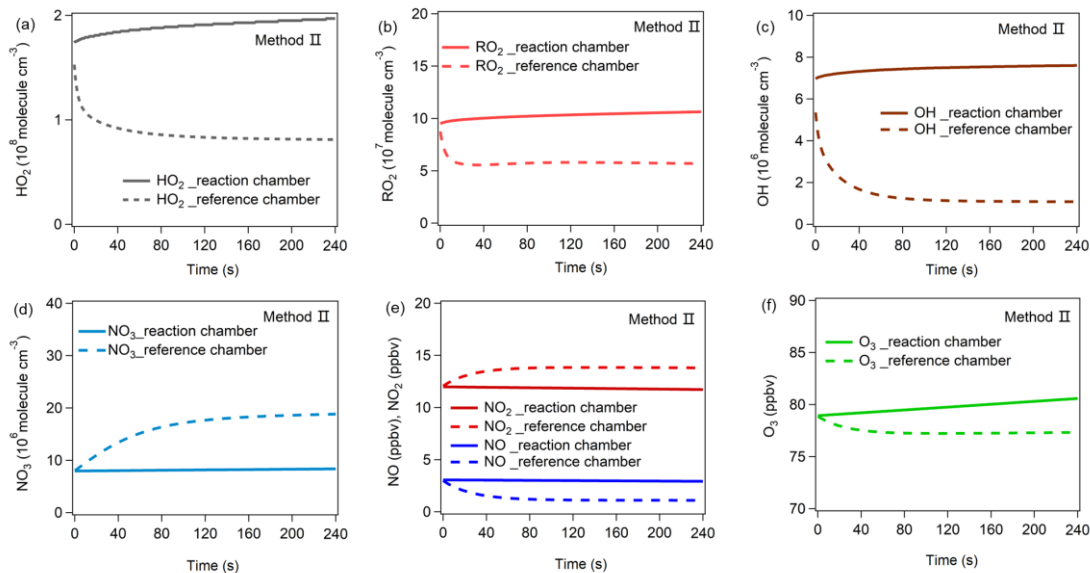

325  
 326 **Figure S18: The variations of (a) HO<sub>2</sub>, (b) RO<sub>2</sub>, (c) OH, (d) NO<sub>3</sub> and (e) NO, NO<sub>2</sub>, and (f) O<sub>3</sub> mixing ratios**  
 327 **during the 3<sup>rd</sup>-stage 4-min model simulation using method II.**

329 OH, HO<sub>2</sub>, RO<sub>2</sub>, and NO<sub>3</sub> concentrations greatly impact the O<sub>3</sub> production and destruction rate. To  
 330 better understand the factors that drive the OH, HO<sub>2</sub>, RO<sub>2</sub>, and NO<sub>3</sub> concentration changes in method II,  
 331 we have added their production and destruction pathways in Fig. S19. We found that the decrease in HO<sub>2</sub>

332 and RO<sub>2</sub> concentrations in the reference chamber in the 1<sup>st</sup> half minute was mainly due to NO titration  
333 effects, as high NO mixing ratios existed during the 1<sup>st</sup> half minute. The HO<sub>2</sub> and RO<sub>2</sub> concentrations  
334 were became stable afterwards, the main production pathway for HO<sub>2</sub> was RO+O<sub>2</sub> reaction/RO  
335 decomposition, followed by OH+VOCs reaction, OVOCs photolysis (i.e., C<sub>3</sub>H<sub>4</sub>O<sub>2</sub>, C<sub>2</sub>H<sub>2</sub>O<sub>2</sub>, C<sub>4</sub>H<sub>6</sub>O<sub>2</sub>),  
336 and NO<sub>3</sub>+VOCs reaction; while the main production pathway for RO<sub>2</sub> was OH+ VOCs reaction, followed  
337 by OVOCs photolysis (i.e., C<sub>3</sub>H<sub>4</sub>O<sub>2</sub>, C<sub>2</sub>H<sub>2</sub>O<sub>2</sub>, C<sub>4</sub>H<sub>6</sub>O<sub>2</sub>), OH+CO, NO<sub>3</sub>+VOCs reaction, etc.; the main  
338 destruction pathways for HO<sub>2</sub> and RO<sub>2</sub> were HO<sub>2</sub>+NO and RO<sub>2</sub>+NO, respectively. The main OH  
339 production and destruction pathways in the reference chamber was HO<sub>2</sub>+NO reaction and OH+ VOCs  
340 reaction, respectively. Due to sufficiently high  $J(\text{NO}_3)$  (~ 100 % of that in the reaction chamber) and NO<sub>2</sub>  
341 concentrations in the reference chamber, the NO<sub>3</sub> photolysis and NO<sub>2</sub>+NO<sub>3</sub> reaction consumed NO<sub>3</sub> in  
342 the reference chamber, but the NO<sub>3</sub> concentrations were still high due to high production rates of NO<sub>3</sub> at  
343 the same time. Similar with the results obtained from method I as described in the main manuscript, for  
344 method II, the main NO<sub>3</sub> source in the reference chamber was the NO<sub>2</sub>+O<sub>3</sub> reaction, followed by N<sub>2</sub>O<sub>5</sub>  
345 decomposition. The NO concentrations were relatively high in the 1<sup>st</sup> minute and consumed NO<sub>3</sub> very  
346 quickly, but due to continuous NO<sub>3</sub> sources, the net NO<sub>3</sub> production rates ( $P(\text{NO}_3)_{\text{net}}$ ) were positive (as  
347 shown in Fig. S19b4), which caused the NO<sub>3</sub> concentration to continue to increase (as shown in Fig.  
348 S18d). The main difference in NO<sub>3</sub> production in the reference chamber compared to that in the reaction  
349 chamber was the much higher N<sub>2</sub>O<sub>5</sub> decomposition, which was mainly due to the high NO<sub>2</sub>  
350 concentrations in the reference chamber. On the other hand, although the NO+NO<sub>3</sub> reaction was also one  
351 of the dominant NO<sub>3</sub> destruction pathways, NO<sub>3</sub> consumed by the NO+NO<sub>3</sub> reaction was significantly  
352 smaller than NO<sub>3</sub> produced by the NO<sub>2</sub>+O<sub>3</sub> reaction. The integrated production and destruction rates of  
353 RO<sub>x</sub> are shown in Fig. S20.

354

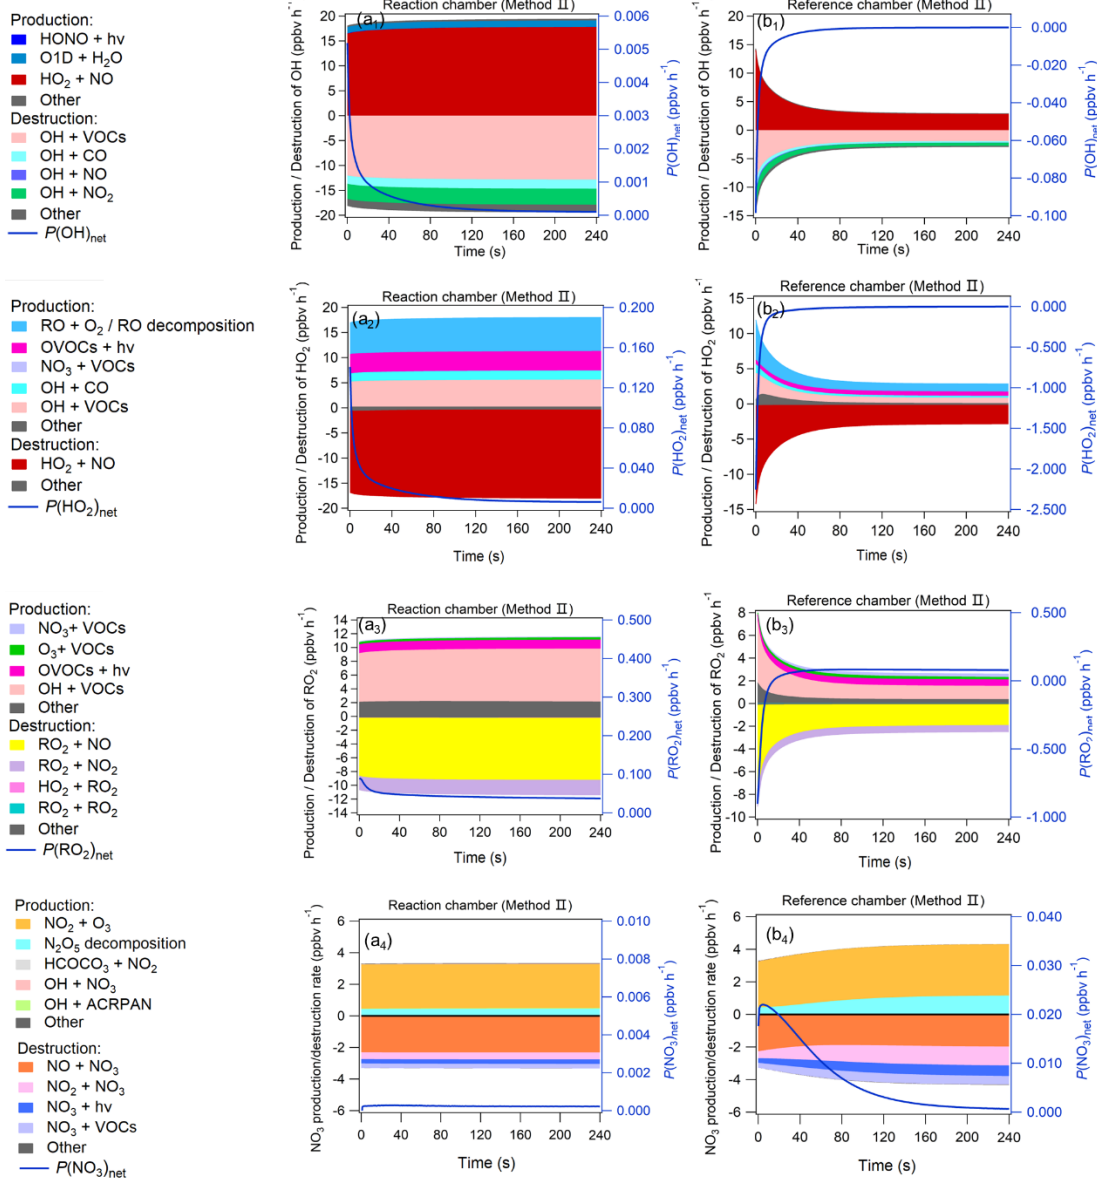

355

356 **Figure S19: Production and destruction pathways of OH(a<sub>1</sub>, b<sub>1</sub>), HO<sub>2</sub>(a<sub>2</sub>, b<sub>2</sub>), RO<sub>2</sub>(a<sub>3</sub>, b<sub>3</sub>), and NO<sub>3</sub>(a<sub>4</sub>, b<sub>4</sub>)**

357 **during the 3<sup>rd</sup>-stag 4-min model simulation in the reaction and reference chambers in method II.**

358

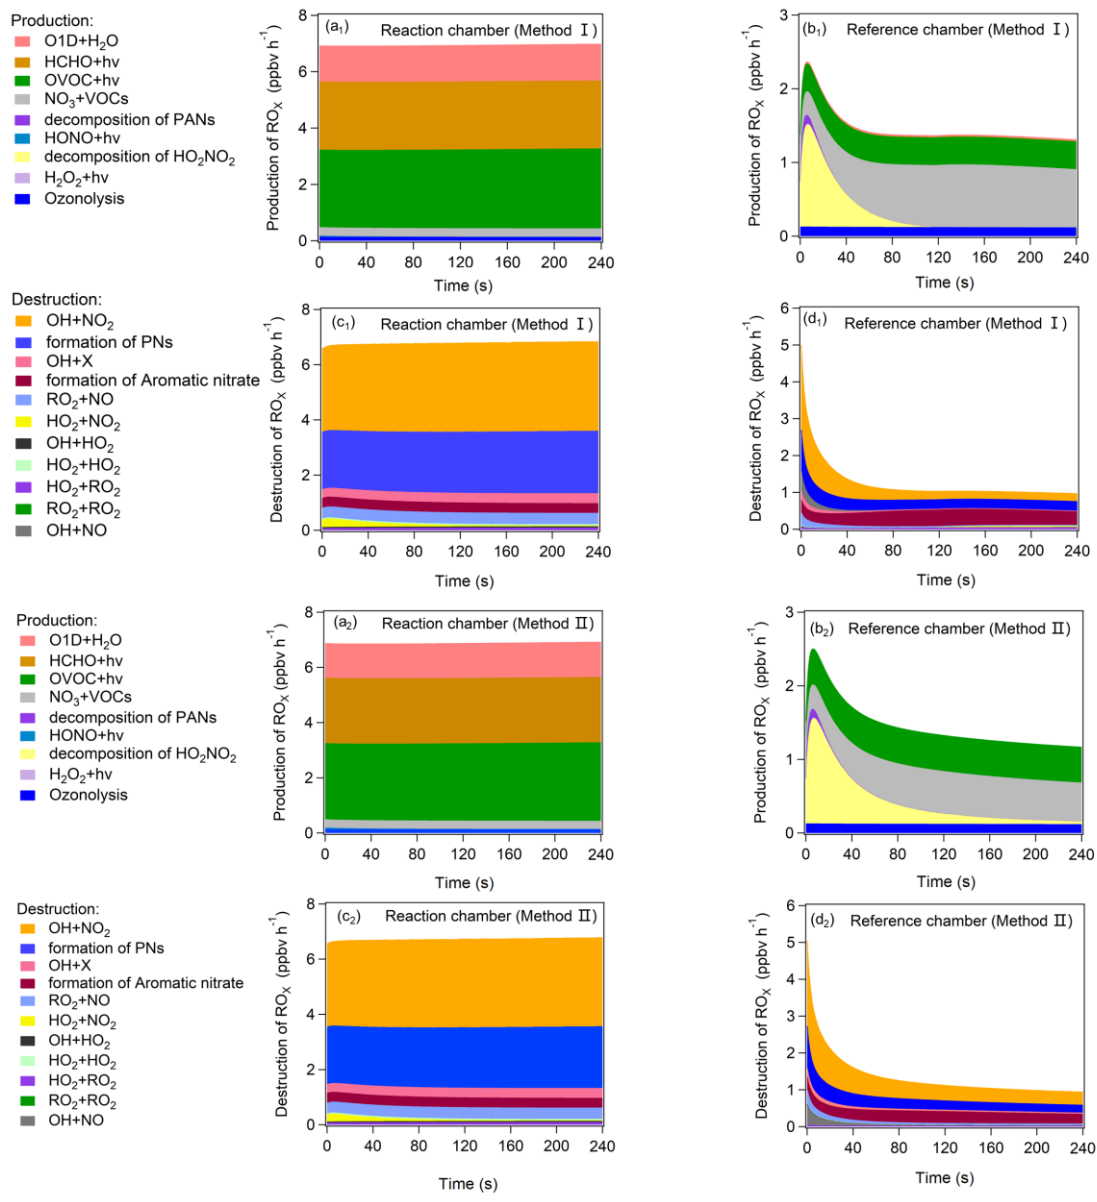

359  
 360  
 361  
 362  
 363  
 364

**Figure S20: Production and destruction pathways of RO<sub>x</sub> during the 3<sup>rd</sup>-stage 4-min model simulation in the reaction and reference chambers (PAN: Peroxyacetyl Nitrate; PNs: formations of all peroxy nitrate (including CH<sub>3</sub>O<sub>2</sub>NO<sub>2</sub> and PAN; X: PAN and the net loss of OH+NO to form HONO (usually small)).**

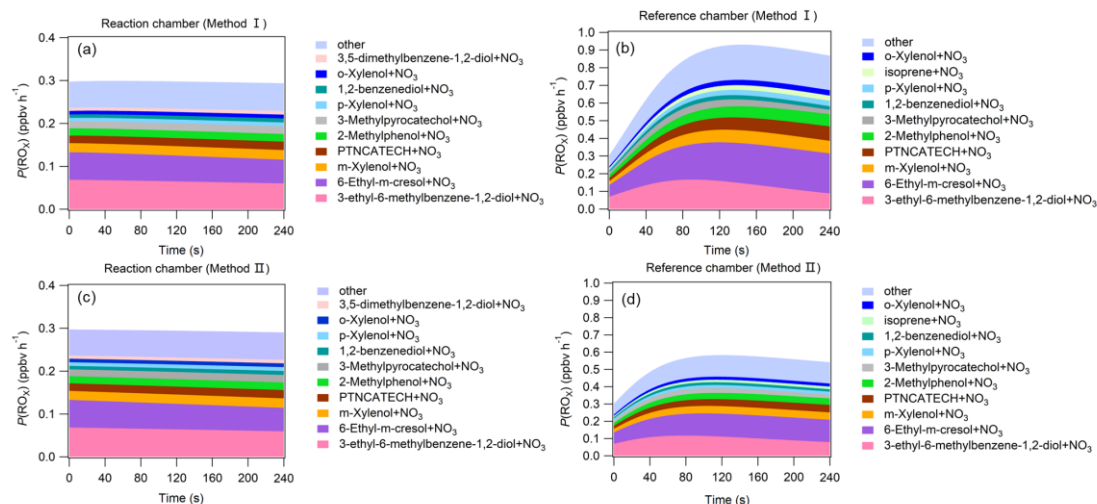

365  
366

367 **Figure S21: The  $P(\text{RO}_x)$  pathways related to  $\text{NO}_3+\text{VOCs}$  reactions during the 3<sup>rd</sup>-stage 4-minute model**  
368 **simulation in the reaction and reference chambers in method I (a)-(b) and method II (c)-(d).**

369 Figures S22a–d show the modeled  $P(\text{O}_3)_{\text{net}}$  and the source and sink of various species during the  
370 3<sup>rd</sup>-stage 4-min simulation in method II. Figure S22a shows the steady state of  $P(\text{O}_3)_{\text{net}}$  and the various  
371 species in the ambient atmosphere achieved in the last 1 s of the 2<sup>nd</sup>-stage simulation; Figs. S22b-c show  
372 the modeled  $P(\text{O}_3)_{\text{net}}$  and the  $\text{O}_3$  chemical budgets in the reaction and reference chambers during the  
373 model simulation period; Figure S22d summarized the modeled  $P(\text{O}_3)_{\text{net}}$  in the ambient atmosphere, and  
374 that in the reaction and reference chambers, in order to compare the modeled results with our  
375 measurement results, we calculated the integral mean of the modeled  $P(\text{O}_3)_{\text{net}}$  in the reaction and  
376 reference chambers and appended the related measured  $P(\text{O}_3)_{\text{net}}$  value during this 4-min simulation time  
377 onto Fig. S22d. Further, the reaction weights of different production and destruction reactions process of  
378  $\text{O}_3$  are shown in Figs. S22e–h.

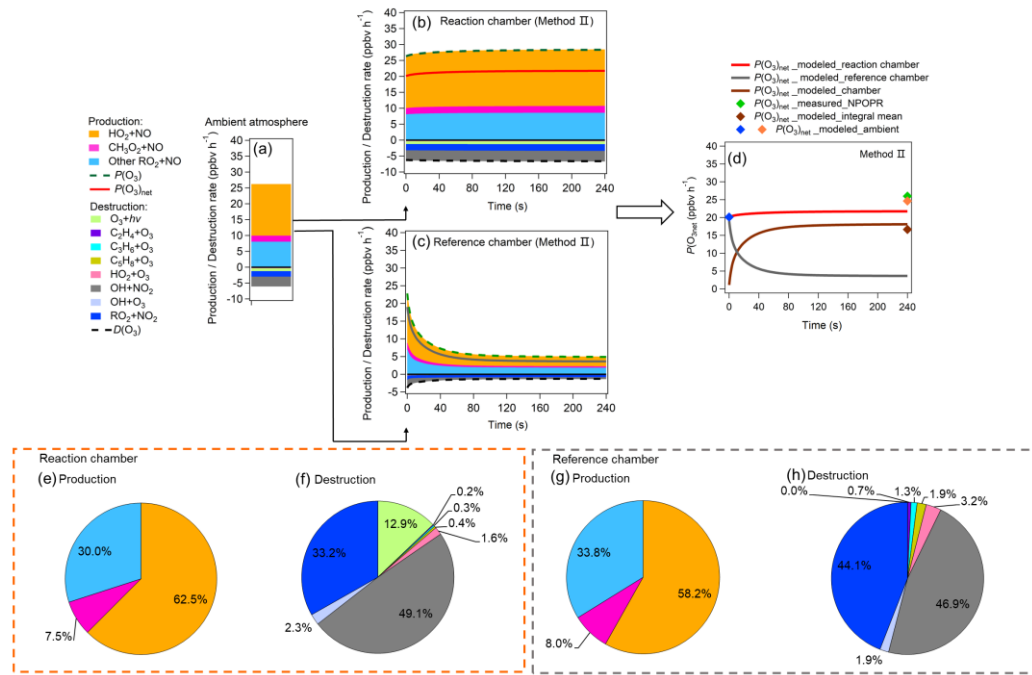

379  
380  
381  
382  
383  
384  
385  
386  
387  
388  
389  
390  
391

Figure S22: (a)–(c) Modeled  $P(O_3)_{net}$  and  $O_3$  chemical budgets in (a) the ambient air when injected into the reaction and reference chambers and (b–c) the reaction and reference chambers during the 4-min model simulation; (d)  $P(O_3)_{net}$ , where  $P(O_3)_{net\_modeled\_ambient}$  represent the modeled  $P(O_3)_{net}$  in ambient air at the time before (blue marker) and after (orange marker) the sampled ambient air was injected into the dual-channel reaction chamber.  $P(O_3)_{net\_modeled\_reaction\ chamber}$  and  $P(O_3)_{net\_modeled\_reference\ chamber}$  represent the  $P(O_3)_{net}$  change trends during the 4-min photochemical reactions in the reaction and reference chambers, respectively.  $P(O_3)_{net\_modeled\_chamber} = P(O_3)_{net\_modeled\_reaction\ chamber} - P(O_3)_{net\_modeled\_reference\ chamber}$ , and  $P(O_3)_{net\_modeled\_integral\ mean}$  represents the integral mean of the  $P(O_3)_{net\_modeled\_chamber}$ . Moreover,  $P(O_3)_{net\_measured\_NPOPR}$  is the  $P(O_3)_{net}$  measured by NPOPR detection system. (e)–(h) Reaction weights of each production and destruction reaction process of  $O_3$  in the reaction and reference chambers in method II.

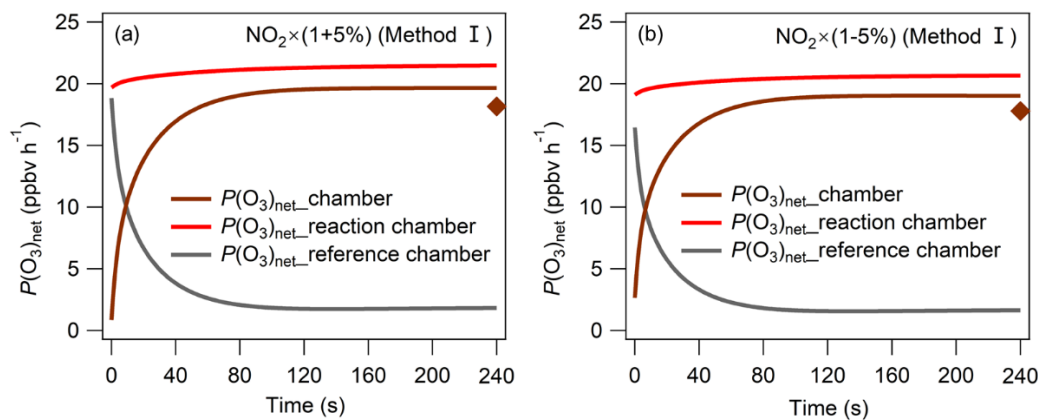

392  
393  
394

Figure S23:  $P(O_3)_{net}$  changing in the reaction and reference chambers in method I with  $\pm 5\%$  of measured  $NO_2$ .

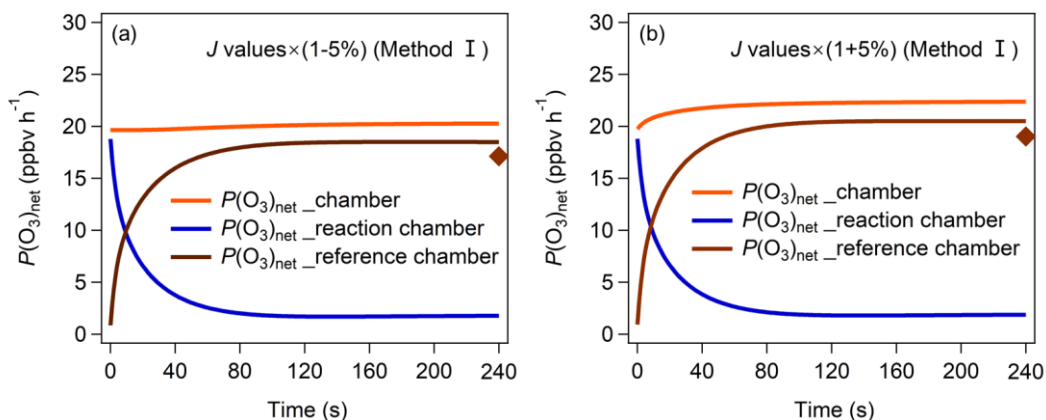

395

396 **Figure S24:  $P(O_3)_{net}$  changing in the reaction and reference chambers in method I with  $\pm 5\%$  of measured  $J$**   
 397 **values.**

398 From Fig. S22, the  $P(O_3)$  and  $D(O_3)$  were almost the same within the 4-min reaction in the reaction  
 399 chamber (all species reached a steady state condition), while the  $P(O_3)$  and  $D(O_3)$  in the reference  
 400 chamber decreased significantly within the 1<sup>st</sup> minute, and kept stable in the following minutes. In the  
 401 reaction chamber, the  $HO_2+NO$  reaction contributed most to  $P(O_3)$ , accounting for 62.5 % of the total  
 402  $P(O_3)$ , with the integral mean value of 17.5 ppbv h<sup>-1</sup> in the reaction chamber. The second important  
 403 pathway of  $P(O_3)$  was  $RO_2+NO$  (occupied 37.5 % of the total  $P(O_3)$ ). The reaction of  $RO_2+NO$  contained  
 404 more than 1200 types of  $RO_2$  radicals, and the pathway of  $CH_3O_2+NO$  contributed 7.5 % of the total  
 405  $P(O_3)$ . The most important contributor of  $D(O_3)$  was  $OH+NO_2$  (49.1 %), followed by  $RO_2+NO_2$  (33.2 %),  
 406  $O_3$  photolysis (12.9 %),  $O_3+OH$  (2.3 %),  $O_3+HO_2$  (1.6 %),  $C_5H_8+O_3$  (0.4 %),  $C_3H_6+O_3$  (0.3 %), and  
 407  $C_2H_4+O_3$  (0.2 %). In the reference chamber, the integral mean value of  $P(O_3)$  was 3.7 ppbv h<sup>-1</sup>, the  
 408  $HO_2+NO$  contributed most to  $P(O_3)$  (accounting for 58.2 % of the total  $P(O_3)$ ), followed by  $RO_2+NO$   
 409 (occupied 41.8 % of the total  $P(O_3)$ ), in which the  $CH_3O_2+NO$  contributed 8.0 % of the total  $P(O_3)$ . The  
 410 most important contributor of  $D(O_3)$  was  $OH+NO_2$  (46.9 %), followed by  $RO_2+NO_2$  (44.1 %),  $O_3+HO_2$   
 411 (3.2 %),  $C_5H_8+O_3$  (1.9 %),  $O_3+OH$  (1.9 %),  $C_3H_6+O_3$  (1.3 %),  $C_2H_4+O_3$  (0.7 %), and  $O_3$  photolysis  
 412 (0.0 %). For all  $P(O_3)$  reactions, the weight of  $RO_2+NO$  reaction in the reference chamber was 4.3 %  
 413 higher than that in the reaction chamber, however, for all  $D(O_3)$  reactions, the weight of  $RO_2+NO_2$   
 414 reaction in the reference chamber was 10.9 % higher than that in the reaction chamber, which will  
 415 somehow mitigate the high  $P(O_3)$  caused by  $RO_2+NO$  in the reference chamber. Figure S22d shows that  
 416 the  $P(O_3)_{net}$  (26.0 ppbv h<sup>-1</sup>) measured by the NPOPR detection system was 9.3 ppbv h<sup>-1</sup> higher than the  
 417 modeled value (16.7 ppbv h<sup>-1</sup>). This difference was much larger than 7.5 ppbv h<sup>-1</sup> obtained from method

418 I, this may be due to the transmittance of  $J(\text{NO}_2)$  in the reference chamber in method II ( $\sim 30\%$ ) was  
419 much higher than that in method I ( $\sim 9\%$ ),  $\text{NO}_2$  photolysis products  $\text{NO}$ , it involved in the main  $\text{O}_3$   
420 production reactions  $\text{HO}_2+\text{NO}$  and  $\text{RO}_2+\text{NO}$ , so the modeled  $P(\text{O}_3)_{\text{net}}$  in the reference chamber was  
421 slightly overestimated in method II, thus leading to an underestimation of total  $P(\text{O}_3)_{\text{net}}$ .  
422



423 **References**

- 424 Baier, B. C., Brune, W. H., Lefer, B. L., Miller, D. O., and Martins, D. K.: Direct ozone production rate  
425 measurements and their use in assessing ozone source and receptor regions for Houston in 2013, *Atmos.*  
426 *Environ.*, 114, 83-91, <http://dx.doi.org/10.1016/j.atmosenv.2015.05.033>, 2015.
- 427 Calvert, J.G., Atkinson, R., Becker, K.H., Kamens, R.M., Seinfeld, J.H., Wallington, T.H., Yarwood, G.:  
428 The mechanisms of atmospheric oxidation of the aromatic hydrocarbons, Oxford University Press,  
429 2002.
- 430 Cazorla, M., and Brune, W. H.: Measurement of ozone production sensor, *Atmos. Meas. Tech.*, 3, 545-  
431 555, <https://doi.org/10.5194/amt-3-545-2010>, 2010.
- 432 Chen, S., Ren, X., Mao, J., Chen, Z., Brune, W. H., Lefer, B., Rappenglück, B., Flynn, J., Olson, J., and  
433 Crawford, J. H.: A comparison of chemical mechanisms based on TRAMP-2006 field data, *Atmos.*  
434 *Environ.*, 44, 4116-4125, <https://doi.org/10.1016/j.atmosenv.2009.05.027>, 2010.
- 435 Chen, S., and Brune, W. H.: Global sensitivity analysis of ozone production and O<sub>3</sub>-NO<sub>x</sub>-VOC limitation  
436 based on field data, *Atmos. Environ.*, 55, 288-296, <https://doi.org/10.1016/j.atmosenv.2012.03.061>,  
437 2012.
- 438 Deshpande, R. D., Medha, D., Virendra, P., Kumar, H., & Gupta, S. K. : Water vapor source identification  
439 for daily rain events at Ahmedabad in semi-arid western India: Wind trajectory analyses.  
440 *Meteorological Applications*, 22, 754–762. <https://doi.org/10.1002/met.1515>, 2016.
- 441 Emmerson, K. M., Carslaw, N. C., Carslaw, D. C., Lee, J. D., McFiggans, G., Bloss, W. J., Gravestock,  
442 T., Heard, D. E., Hopkins, J., Ingham, T., Pilling, M. J., Smith, S. C., Jacob, M., and Monks, P. S.: Free  
443 radical modelling studies during the UK TORCH Campaign in Summer 2003, *Atmos. Chem. Phys.*, 7,  
444 167–181, <https://doi.org/10.5194/acp-7-167-2007>, 2007.
- 445 Hao, C., Song, L., and Zhao, W.: HYSPLIT-based demarcation of regions affected by water vapors from  
446 the South China Sea and the Bay of Bengal, *European Journal of Remote Sensing*, 54, 348-355,  
447 <https://doi.org/10.1080/22797254.2020.1795730>, 2020.
- 448 Kanaya, Y., Tanimoto, H., Yokouchi, Y., Fumikazu Taketani, F. T., Komazaki, Y., Irie, H., Takashima, H.,  
449 Pan, X., Nozoe, S., and Inomata, S.: Diagnosis of photochemical ozone production rates and limiting  
450 factors in continental outflow air masses reaching Fukue Island, Japan: ozone-control implications,  
451 *Aerosol. Air. Qual. Res.*, 16, 430-441, <https://doi.org/10.4209/aaqr.2015.04.0220>, 2016.

452 Lantz, K.O., Shetter, R.E., Cantrell, C.A., Flocke, S.J., Calvert, J.G., Madronich, S.: Theoretical,  
453 actinometric, and radiometric determinations of the photolysis rate coefficient of NO<sub>2</sub> during the  
454 Mauna Loa Observatory Photochemistry Experiment 2, *J. Geophys. Res.-Atmos.*, 101, 14613-14630,  
455 <https://doi.org/10.1029/96JD00215>,1996.

456 Madronich, S. and Flocke, S. (ed. by P. Boule): The role of solar radiation in atmospheric chemistry, 2,  
457 *Environmental photochemistry*, 1-26, 1999.

458 Mazzuca, G. M., Ren, X., Loughner, C. P., Estes, M., Crawford, J. H., Pickering, K. E., Weinheimer, A.  
459 J., and Dickerson, R. R.: Ozone production and its sensitivity to NO<sub>x</sub> and VOCs: results from the  
460 DISCOVER-AQ field experiment, Houston 2013, *Atmos. Chem. Phys.*, 16, 14463-14474,  
461 <https://doi.org/10.5194/acp-16-14463-2016>, 2016.

462 Ren, X., van Duin, D., Cazorla, M., Chen, S., Mao, J., Zhang, L., Brune, W. H., Flynn, J. H., Grossberg,  
463 N., Lefer, B. L., Rappenglück, B., Wong, K. W., Tsai, C., Stutz, J., Dibb, J. E., Thomas Jobson, B.,  
464 Luke, W. T., and Kelley, P.: Atmospheric oxidation chemistry and ozone production: Results from  
465 SHARP 2009 in Houston, Texas, *J. Geophys. Res.-Atmos.*, 118, 5770-5780,  
466 <https://doi.org/10.1002/jgrd.50342>, 2013.

467 Sadanaga, Y., Kawasaki, S., Tanaka, Y., Kajii, Y., and Bandow, H.: New system for measuring the  
468 photochemical ozone production rate in the atmosphere, *Environ. Sci. Technol.*, 51, 2871-2878,  
469 <https://doi.org/10.1021/acs.est.6b04639>, 2017.

470 Sklaveniti, S., Locoge, N., Stevens, P. S., Wood, E., Kundu, S., and Dusanter, S.: Development of an  
471 instrument for direct ozone production rate measurements: measurement reliability and current  
472 limitations, *Atmos. Meas. Tech.*, 11, 741-761, <https://doi.org/10.5194/amt-11-741-2018>, 2018.
